## **Male sex hormone and reduced plakoglobin jointly impair atrial conduction and cardiac sodium currents**

Laura C. Sommerfeld<sup>1,2,3</sup>, Andrew P. Holmes<sup>1,4</sup>, Ting Y. Yu<sup>1,5</sup>, Christopher O'Shea<sup>1,5</sup>,  
Deirdre M. Kavanagh<sup>1,6</sup>, Jeremy M. Pike<sup>1,6</sup>, Thomas Wright<sup>1</sup>, Fahima Syeda<sup>1</sup>, Areej Aljehani<sup>1</sup>,  
Tania Kew<sup>1</sup>, Victor R. Cardoso<sup>1,7</sup>, S. Nashitha Kabir<sup>1</sup>, Claire Hepburn<sup>1</sup>, Priyanka M. Menon<sup>1</sup>,  
Sophie Broadway-Stringer<sup>1</sup>, Molly O'Reilly<sup>1</sup>, Anika Witten<sup>8,9</sup>, Lisa Fortmueller<sup>2,3</sup>,  
Susanne Lutz<sup>11</sup>, Alexandra Kulle<sup>12</sup>, Georgios V. Gkoutos<sup>7,13,14</sup>, Davor Pavlovic<sup>1</sup>, Wiebke Arlt<sup>15</sup>,  
Gareth G. Lavery<sup>15</sup>, Richard Steeds<sup>1,16</sup>, Katja Gehmlich<sup>1</sup>, Monika Stoll<sup>8,9,10</sup>, Paulus  
Kirchhof<sup>1,3,17</sup>, & Larissa Fabritz<sup>1,2,3</sup>

<sup>1</sup>Institute of Cardiovascular Sciences, University of Birmingham, UK

<sup>2</sup>University Center of Cardiovascular Science, University Heart and Vascular Center, UKE Hamburg, Germany

<sup>3</sup>German Center for Cardiovascular Research (DZHK), Standort Hamburg/Kiel/Lübeck, Germany

<sup>4</sup>School of Biomedical Sciences, Institute of Clinical Sciences, University of Birmingham, UK

<sup>5</sup>Research and Training Centre in Physical Sciences for Health, Birmingham, UK

<sup>6</sup>Centre of Membrane Proteins and Receptors (COMPARE), University of Birmingham, UK

<sup>7</sup>Institute of Cancer and Genomic Sciences, University of Birmingham, UK

<sup>8</sup>Genetic Epidemiology, Institute for Human Genetics, University of Münster, Germany

<sup>9</sup>Core Facility Genomics of the Medical Faculty, University of Münster, Germany

<sup>10</sup>Cardiovascular Research Institute Maastricht, Department of Biochemistry, Maastricht University, The Netherlands

<sup>11</sup>Institute of Pharmacology and Toxicology, University Medical Center Göttingen, Germany

<sup>12</sup>Division of Paediatric Endocrinology and Diabetes, University Hospital Schleswig-Holstein, Campus Kiel, Germany

<sup>13</sup>Institute of Translational Medicine, University Hospitals Birmingham NHS Foundation Trust, Birmingham, UK

<sup>14</sup>MRC Health Data Research UK (HDR), Midlands Site, UK

<sup>15</sup>Institute of Metabolism and Systems Research (IMSR) University of Birmingham, UK & Centre for Endocrinology, Diabetes and Metabolism (CEDAM), Birmingham Health Partners

<sup>16</sup>Department of Cardiology, University Hospitals Birmingham NHS Foundation Trust, Birmingham, UK

<sup>17</sup>Department of Cardiology, University Heart & Vascular Center Hamburg, University Medical Center Hamburg-Eppendorf, Hamburg, Germany

**Corresponding author:**

Professor Larissa Fabritz  
University Center of Cardiovascular Science  
University Heart and Vascular Center, UKE Hamburg

Hamburg, Germany  
+49 40 7410 57980  
L.Fabritz@uke.de

**Conflicts of interest**

The authors have declared no direct conflict of interest in regards to the manuscript.

L.F. has received institutional research grants from governmental and charity funding agencies and several biomedical companies.

P.K. has received research support from several drug and device companies active in atrial fibrillation and has received honoraria from several such companies in the past.

L.F. and P.K. are listed as inventors on two patents held by University of Birmingham (Atrial Fibrillation Therapy WO 015140571, Markers for Atrial Fibrillation WO 2016012783).

Word count: 11408 (all text inclusive of title page, full text, references, figure legends and tables)

## 1 **Abstract**

2 Androgenic anabolic steroids (AAS) are commonly abused by young men. Male sex  
3 associates with earlier manifestation of common and rare cardiac conditions including atrial  
4 fibrillation and arrhythmogenic right ventricular cardiomyopathy (ARVC). Clinical data suggest  
5 an atrial involvement in ARVC. The disease is caused by desmosomal gene defects such as  
6 reduced plakoglobin expression. Analysis of clinical records from 146 ARVC patients  
7 identified male preponderance and increased prevalence of atrial arrhythmias in patients with  
8 definite ARVC. Definite patients displayed ECG changes suggesting atrial remodelling. To  
9 study mechanisms of atrial remodelling due to desmosomal vulnerability and AAS, young  
10 adult male mice, heterozygously deficient for plakoglobin (Plako<sup>+/-</sup>) and wildtype (WT)  
11 littermates, were chronically exposed to 5 $\alpha$ -dihydrotestosterone (DHT) or placebo. DHT  
12 increased atrial expression of pro-hypertrophic, fibrotic and inflammatory transcripts. DHT  
13 caused atrial conduction slowing, decreased peak sodium current density, reduced action  
14 potential amplitude and lowered the peak depolarisation rate in Plako<sup>+/-</sup> but not WT atria.  
15 Super-resolution microscopy revealed a reduction in Na<sub>v</sub>1.5 clustering in Plako<sup>+/-</sup> atrial  
16 cardiomyocytes following DHT exposure. These data reveal that AAS combined with  
17 plakoglobin deficiency cause pathological atrial electrical remodelling in young male hearts.  
18 AAS abuse may increase the risk of atrial myopathy in males with desmosomal gene  
19 variants.

20 **Key words:** arrhythmias, ion channels, sex hormones

## 21 **Introduction**

22 Several inherited arrhythmia syndromes develop more severe phenotypes in men carrying  
23 pathogenic variants, e.g. Brugada syndrome or Arrhythmogenic Right Ventricular  
24 Cardiomyopathy (ARVC) (1). Male sex also associates with greater incidence of atrial  
25 arrhythmias, both in the general population and in rare conditions (2-7). Effects mediated by  
26 anabolic androgenic steroids (AAS) such as testosterone and the most potent androgen,  
27 5 $\alpha$ -dihydrotestosterone (DHT), could contribute. Abuse of AAS is an emerging global health  
28 concern, not restricted to elite athletes but common in the general population, with reports  
29 indicating a 3.3% lifetime prevalence worldwide (8). AAS are abused predominately by men  
30 to increase muscle mass, improve athletic performance and alter appearance (8). However,  
31 AAS can cause cardiac pathology, including hypertrophy and electrophysiological changes  
32 (9-14). Atrial arrhythmias have recently been associated with elevated total plasma  
33 testosterone levels in men (15) and observed in patients known to take AAS devoid of a  
34 clinical indication (16-18). Despite these observations, the mechanisms underpinning cardiac  
35 electrical remodelling in response to higher levels of AAS are largely unknown.  
36 ARVC has recently been reported to show more adverse outcomes in men (19) related to sex  
37 hormone levels (20). Emerging evidence suggests increased incidence of atrial arrhythmias  
38 in cardiomyopathies (21). ARVC is often caused by variants in desmosomal genes including  
39 plakoglobin (22-25). Plakoglobin is located in desmosomal junctional complexes where it  
40 stabilizes cell-cell contacts (26), thereby maintaining mechanical and electrical integrity of the  
41 myocardium.  
42 We hypothesized that a substantial proportion of ARVC patients is suffering from clinically  
43 relevant atrial arrhythmias and that vulnerability of the desmosome, caused by e.g.  
44 plakoglobin reduction, may increase the risk of male sex hormone-induced atrial electrical  
45 remodelling.  
46 To test this hypothesis, we screened patient records from definite and non-definite ARVC  
47 patients seen at a tertiary center inherited cardiac conditions clinic for atrial arrhythmias. We

48 furthermore employed a murine ARVC model to study the effects of chronically elevated AAS  
49 levels in male mice with heterozygous plakoglobin (gamma-catenin) deficiency (Plako<sup>+/-</sup>) (27)  
50 and their wildtype (WT) littermates.

## 51 **Results**

### 52 **Atrial arrhythmias and ECG changes in definite ARVC patients**

53 The clinical cohort studied comprised of 146 patients with suspected cardiomyopathy; 97  
54 were identified as “Non-definite” (possible) ARVC cases and 49 as “Definite” ARVC, i.e.  
55 presenting with a complete phenotype according to 2010 Task Force Criteria (1). Mean age  
56 of the patients at time of ECG analyses was not different between the groups ( $42 \pm 18$  years  
57 for non-definite vs  $43 \pm 18$  years for definite). 24% of definite ARVC patients experienced  
58 atrial fibrillation and/or flutter compared to 3% of the non-definite ARVC patients (Table 1).  
59 There was a significant association between sex and ARVC diagnosis type (Table 1, 43%  
60 male amongst non-definite vs. 73% male amongst definite patients). Semi-automated  
61 analysis of digital ECG lead II recordings focussing on atrial parameters (Figure 1A) showed  
62 PR interval prolongation in advanced, definite disease stage (Figure 1B). P wave duration  
63 and P wave area were significantly increased in definite compared to non-definite patients.  
64 Non-definite ARVC patients exhibited no difference in the analyzed P wave parameters  
65 compared to unaffected control subjects. Results of a meta-analysis of clinical observational  
66 studies are presented in the discussion.

### 67 **5 $\alpha$ -dihydrotestosterone (DHT) causes general and cardiac growth response in mice**

68 To study increased androgen exposure and desmosomal instability jointly in atria, Plako<sup>+/-</sup>  
69 mice, an established animal model of ARVC (28) and wildtype (WT) littermates were  
70 subjected to chronic DHT treatment over 6 weeks (please refer to Figure 2A for an overview  
71 scheme). Treatment led to a 3-4-fold increase in serum DHT concentration in both genotypes  
72 compared to controls (Ctr) (Figure 2B). Moreover, it increased body weight, seminal vesicle  
73 mass/tibia length ratio and atrial weight/tibia length ratio as well as causing left ventricular  
74 hypertrophy in Plako<sup>+/-</sup> animals (Figure 2C, Supplementary Figure 1).

75 **DHT induces ARVC-like atrial ECG changes in plakoglobin-deficient mice**

76 To check whether atrial ECG changes observed in definite ARVC patients are similarly  
77 present in the murine model, ECGs were recorded from mice following DHT treatment. Both  
78 PR interval as well as P wave duration were prolonged in Plako<sup>+/-</sup> animals exposed to DHT  
79 compared to WT littermates exposed to DHT (Figure 3).

80 **DHT causes atrial unfolded area dilation and atrial conduction slowing in heterozygous**  
81 **plakoglobin-deficient hearts**

82 Left atrial unfolded area to tibia length ratio was increased in Plako<sup>+/-</sup> DHT compared to  
83 Plako<sup>+/-</sup> Ctr (Figure 4A&B), but not in WT left atria after DHT exposure. Chronic DHT  
84 exposure slowed conduction in Plako<sup>+/-</sup> but not WT atria (Figure 4C&D). The reduction in  
85 conduction velocity in Plako<sup>+/-</sup> DHT left atria was more pronounced at higher pacing  
86 frequencies. The Plako<sup>+/-</sup> left atria exposed to DHT exhibited an overall prolongation of 95%  
87 left atrial activation times and increased beat-to-beat activation variability compared to WT Ctr  
88 and Plako<sup>+/-</sup> Ctr (Figure 5). Connexin expression was not impaired (Supplementary Figure 2).

89 **DHT induces atrial expression of gene profiles implicated in ARVC**

90 Exploratory RNA sequencing analysis confirmed approximately 50% reduction in atrial  
91 plakoglobin (*Jup*) expression in Plako<sup>+/-</sup> compared to WT animals (Figure 6A). In control  
92 hearts, gene expression patterns did not markedly differ between genotypes (data not  
93 shown). Chronic DHT exposure resulted in significant transcriptional changes in atria of both,  
94 WT and Plako<sup>+/-</sup> mice (Figure 6B&C). DHT activated expression of genes associated with  
95 muscle growth (e.g. *Igf1*, *Mtpn*, *Myocd*), but additionally also immune (e.g. *C7*, *Tlr3*, *Tlr4*) and  
96 pro-fibrotic response genes (e.g. *Col1a1*, *Col3a1*, *Srf*, *Lox*) (Figure 6C). Before-mentioned  
97 transcriptional changes were similarly induced in left and right atria (Supplementary Figure 3).  
98 While atrial cardiac myocyte diameter and endomysial collagen deposition was not  
99 significantly different between genotypes after DHT treatment, as quantified in semi-

100 automated histology analysis (Supplementary Figure 5), cell capacitance was increased by  
101 DHT treatment in Plako<sup>+/-</sup> DHT (Figure 8C).

102 **DHT reduces action potential amplitude and rate of depolarisation in heterozygous**  
103 **plakoglobin-deficient left atria**

104 The intracellular microelectrode technique was used to record transmembrane action  
105 potentials (TAPs) from paced, superfused left atria (Figure 7). Paced left atria isolated from  
106 Plako<sup>+/-</sup> DHT mice showed longer activation times compared to all other groups (Figure 7C,  
107 Supplementary Table 1). Action potential amplitude (APA) was reduced in Plako<sup>+/-</sup> DHT left  
108 atria, as well as the peak rate of depolarisation ( $dV dt^{-1} \max$ ) (e.g. 120 ms pacing cycle length  
109 WT Ctr:  $118 \pm 5$  V/s; WT DHT:  $120 \pm 7$  V/s; Plako<sup>+/-</sup> Ctr:  $116 \pm 4$  V/s; Plako<sup>+/-</sup> DHT:  $89 \pm 5$  V/s)  
110 (Figure 7D&E, Supplementary Table 1), both indicative of sodium current impairments. The  
111 Plako<sup>+/-</sup> DHT left atrial cells had a more positive resting membrane potential than WT Ctr  
112 (Supplementary Table 1). Chronic DHT exposure did not modify action potential duration  
113 (APD) in either genotype (Supplementary Table 1). Beat-averaged left atrial optical APD<sub>90</sub>,  
114 as well as beat-to-beat APD<sub>90</sub> variability were similar between all four groups  
115 (Supplementary Table 2).

116 **DHT decreases peak sodium current density in heterozygous plakoglobin-deficient left**  
117 **atrial cardiac myocytes**

118 To examine mechanisms underlying alterations in action potential morphology and  
119 conduction in the Plako<sup>+/-</sup> DHT left atria, whole-cell patch clamp experiments were performed  
120 monitoring peak sodium current ( $I_{Na}$ ) amplitude and kinetics. Peak whole-cell  $I_{Na}$  density was  
121 decreased by approximately 20% in Plako<sup>+/-</sup> left atrial cells following DHT exposure (Figure  
122 8A&B). Activation kinetics were consistent between all groups ( $V_{50}$  activation, WT Ctr:  $-43 \pm 1$   
123 mV; WT DHT:  $-46 \pm 1$  mV; Plako<sup>+/-</sup> Ctr:  $-46 \pm 1$  mV; Plako<sup>+/-</sup> DHT:  $-46 \pm 2$  mV). DHT exposure  
124 tended to cause a left shift in steady-state inactivation kinetics in both WT and Plako<sup>+/-</sup>, being  
125 statistically significant in Plako<sup>+/-</sup> (Supplementary Figure 5A). The 50% recovery time ( $P_{50}$ )



126 from inactivation was significantly longer in the Plako<sup>+/-</sup> DHT, suggestive of a delayed rate of  
127 sodium channel recovery (Supplementary Figure 5B&C).

128 Left atrial cell capacitance was elevated by DHT exposure in Plako<sup>+/-</sup> (Figure 8C). Of note,  
129 there was a considerable spread of individual cell capacitance in DHT-exposed groups,  
130 indicative of variable degrees of hypertrophy. I<sub>Na</sub> density was negatively correlated against  
131 cell capacitance in Plako<sup>+/-</sup> left atria cardiac myocytes following DHT treatment (Figure 8D).  
132 This negative correlation was not detected in the WT DHT group. These data suggest that a  
133 hypertrophic response in the Plako<sup>+/-</sup> DHT left atrial cardiac myocytes was not matched by a  
134 rise in I<sub>Na</sub>, leading to an overall depletion of I<sub>Na</sub> density. In contrast, hypertrophy in the WT  
135 DHT left atria was matched by an increase in I<sub>Na</sub>, so that I<sub>Na</sub> density was preserved.  
136 Whole left atrial tissue RNA expression of sodium voltage gated channel 5 (*Scn5a*) was  
137 neither significantly affected by genotype, or DHT exposure (Figure 8E).

### 138 **Na<sub>v</sub>1.5 cluster depletion in Plako<sup>+/-</sup> left atrial cardiac myocytes following DHT exposure**

139 To define a molecular cause of I<sub>Na</sub> density depletion in Plako<sup>+/-</sup> DHT left atrial cardiac  
140 myocytes, we examined Na<sub>v</sub>1.5 organisation at super-resolution level using direct Stochastic  
141 Optical Reconstruction Microscopy (dSTORM, workflow see Supplementary Figure 6). Due to  
142 the high variability in T-tubule density between different atrial cells, we focused on Na<sub>v</sub>1.5  
143 channels located within ca. 200 nm of the contact cell surface membrane by using  
144 TIRF/HILO. Exemplary super-resolution images of Na<sub>v</sub>1.5 detections, as well as characteristic  
145 cluster maps are shown in Figure 9A.

146 Characteristics of identified Na<sub>v</sub>1.5 clusters, i.e. cluster density and cluster area, were similar  
147 in all 4 groups (Supplementary Figure 7A&B). The 95% confidence intervals generated from  
148 our murine WT Ctr left atria experiments suggest a range of 3-4x10<sup>-3</sup> Na<sub>v</sub>1.5 channels per  
149 nm<sup>2</sup> cluster (Supplementary Figure 7C, both mean and median at 3x10<sup>-3</sup> channels per nm<sup>2</sup>  
150 cluster), resulting in an estimated nearest-neighbour distance of 20 nm.

151 At the Plako<sup>+/-</sup> DHT left atrial cardiac myocyte membranes, fewer Na<sub>v</sub>1.5 detections were  
152 observed compared to WT DHT (Figure 9A&B). Of the total detections, the proportion present

153 in distinct Na<sub>v</sub>1.5 clusters was significantly lower in the Plako<sup>+/-</sup> DHT compared to WT DHT  
154 cardiac myocytes (Figure 9C).

## 155 Discussion

### 156 Main findings

- 157 • Atrial arrhythmias and P wave changes are common in patients with ARVC.
- 158 • Exposure to the potent androgen 5 $\alpha$ -dihydrotestosterone leads to pro-hypertrophic,  
159 pro-fibrotic and inflammatory transcriptional signatures in murine atria without overt  
160 phenotypic changes.
- 161 • Combining chronic 5 $\alpha$ -dihydrotestosterone exposure with heterozygous plakoglobin  
162 deficiency leads to a profound atrial cardiomyopathy replicating ECG changes in  
163 patients with ARVC.
- 164 • Mechanistically, increased 5 $\alpha$ -dihydrotestosterone concentrations interact with  
165 plakoglobin to decrease the number of membrane-localized Na<sub>v</sub>1.5 clusters, reducing  
166 atrial sodium current density and causing atrial conduction slowing.

167

168 We report that definite ARVC patients exhibit increased P wave area and prolonged PR  
169 interval as well as P wave duration on ECG. A phenocopy of these ECG changes is observed  
170 in plakoglobin-deficient mice exposed to supraphysiological 5 $\alpha$ -dihydrotestosterone (DHT)  
171 concentrations. Heterozygous plakoglobin deficiency predisposes cardiac atrial tissue to  
172 hypertrophy and a reduction in sodium current density after six weeks of exposure to elevated  
173 concentrations of DHT, resulting in a decrease in the peak upstroke velocity of the atrial  
174 action potential ( $dV dt^{-1} \max$ ), left atrial conduction slowing and increased electrical beat-to-  
175 beat variability. Super-resolution microscopy, dSTORM, identified sarcolemmal depletion of  
176 Na<sub>v</sub>1.5 channels and clusters at left atrial cardiac myocytes isolated from Plako<sup>+/-</sup> DHT-treated  
177 mice. This was accompanied by the functional electrophysiological modifications of reduced  
178 atrial Na<sub>v</sub>1.5 current density and impaired atrial conduction.

179 The results underpin a role of plakoglobin in regulating Na<sub>v</sub>1.5 channel cellular localization in  
180 the left atrium and in preserving left atrial electrical integrity in response to stressors such as  
181 pro-hypertrophic DHT exposure.

182 **Patients in the definite ARVC disease stage display a high prevalence of atrial**  
183 **arrhythmias, P wave changes on ECG and preponderance of male sex**

184 A quarter (24%) of the patients with definite ARVC had atrial arrhythmias in our cohort. Meta-  
185 analysis of published studies (between 1991 and 2021) revealed a weighted mean atrial  
186 arrhythmia prevalence of 15% amongst a total of 1915 ARVC patients (Table 3). Over 99% of  
187 the reported patients were diagnosed with definite ARVC according to accepted criteria. Male  
188 preponderance of atrial phenotypes was reported in other cohorts as well (Table 3).

189 P wave duration and P wave area showed pathological changes in patients with definite  
190 ARVC, suggesting pathophysiological remodelling of the atria. P wave prolongation and  
191 increased P wave area have been associated with atrial fibrillation (AF) or increased AF  
192 recurrence (29-32). Furthermore, definite ARVC patients displayed longer PR intervals  
193 compared to non-definite patients and controls, suggesting attenuated conduction of the  
194 atrioventricular node. Conduction slowing is a common feature of heart rhythm disorders  
195 including AF, and acts by permitting the development and maintenance of both micro and  
196 macro re-entry (33). In line with our results, Baturova and colleagues recently found evidence  
197 for ARVC disease progression to be paralleled by changes in P wave area (34). Our data  
198 substantiate clinical evidence for progressive atrial conduction disturbances with progression  
199 of ARVC. Our murine data demonstrate that these changes can arise from an interaction  
200 between genetic desmosomal defects and AAS.

201 **DHT exposure interacts with plakoglobin deficiency leading to atrial electrical**  
202 **dysfunction**

203 Although supraphysiological AAS intake is commonly used by competitive athletes to  
204 enhance performance (doping), reports are unsystematic due to underreporting of AAS

205 intake. Murine models represent a unique tool to observe early atrial changes arising in  
206 interaction between genetic defects in the desmosome and AAS exposure. We show that  
207 chronic DHT exposure combined with heterozygous deletion of plakoglobin prolongs PR  
208 interval and P wave duration and slows atrial conduction. Affected atria did not show fibrotic  
209 or fatty changes, and connexin expression was not altered. A third important determinant of  
210 conduction velocity is the magnitude of depolarising current, primarily carried by Na<sup>+</sup> through  
211 Na<sub>v</sub>1.5 channels (35). Our electrophysiological measurements found reduced atrial action  
212 potential amplitude and upstroke velocity (APA and dV dt<sup>-1</sup> max), demonstrating a decreased  
213 sodium current that is sufficient to lower both the magnitude and rate of depolarisation, key  
214 contributors to cardiac conduction velocity. A delay of sodium current recovery times, as  
215 observed in Plako<sup>+/-</sup> DHT-treated cardiomyocytes, was enhanced at higher pacing  
216 frequencies. Super-resolution microscopy identified reduced availability and altered clustering  
217 of sodium channels as a likely mechanism for these functional defects. The reduced  
218 availability of Na<sub>v</sub>1.5 channels in cells already operating without a sufficient conduction  
219 reserve (36, 37), is likely to cause more pronounced conduction slowing and beat-to-beat  
220 variability as observed at the higher pacing frequencies in our experiments.

221 Supraphysiological DHT concentrations increased atrial expression of genes related to  
222 immune response and fibrotic remodelling. Both processes contribute to the pathophysiology  
223 of ARVC as well as AF (38-46) and are likely intertwined. Lysyl oxidase (*Lox*), which we here  
224 report to be upregulated in atria in response to DHT, mediates cross-linking of collagen I and  
225 collagen III fibrils. Both collagen isoforms, amongst others, were also upregulated in DHT-  
226 exposed atria in our study, indicating remodelling of the extracellular matrix (ECM). *Lox*  
227 overexpression in mice was also found to accelerate the inflammatory response during  
228 angiotensin II (AngII)-induced cardiac hypertrophy, including increased cytokine levels (47).  
229 Among the immune-response genes increased in atrial expression upon DHT treatment were  
230 the Toll-like receptor 3 (*Tlr3*) and the Toll-like receptor 4 (*Tlr4*) in our study. Silencing or  
231 deficiency of these receptors has been demonstrated to improve cardiac function post

232 myocardial infarction in rodent models by attenuating inflammatory cytokine production and  
233 fibrotic scar formation (48, 49). Toll-like receptors can be activated by endogenous ligands,  
234 including components of the extracellular matrix (50), and have been associated with matrix  
235 turn-over.

236 Excessive ECM deposition is another pathological driver of conduction defects (51, 52) and  
237 increased perivascular fibrosis has been observed in the ventricular myocardium of male rats  
238 in response to 20 days of testosterone administration (53). Rho associated coiled-coil  
239 containing protein kinase 2 (*Rock2*)-dependent pathways, implicated in cardiac fibroblast  
240 activation, can regulate expression of ECM component levels, including CTGF (*Ccn2*) and  $\alpha$ -  
241 smooth muscle actin (*Acta2*) (54). Indeed, the expression of *Rock2*, *Ccn2*, as well as *Acta2*  
242 transcript, was upregulated in atria after chronic DHT exposure. *Ccn2* expression, in  
243 response to the pro-hypertrophic stimulus AngII, has previously been shown to be mediated  
244 via the transcription factor serum response factor (*Srf*) in cardiac fibroblasts (55), which we  
245 also found to be upregulated in atria subjected to high concentrations of DHT.

246 Transcriptional changes did not translate to structural changes other than atrial area dilation,  
247 e.g. excessive ECM deposition in atria in our murine study, illustrating the  
248 pathophysiologically relevant interaction of DHT-activated profibrotic signalling with  
249 desmosomal gene defects for the development of atrial conduction slowing.

250 In the scope of this study, we were able to demonstrate that the combination of a pro-  
251 inflammatory/fibrotic environment, caused by DHT, plus the selective reduction in  $I_{Na}$  in  
252 *Plako<sup>+/-</sup>* cardiomyocytes is sufficient to induce conduction slowing and increased beat-to-beat  
253 heterogeneity in these vulnerable atria.

254 While this is the first study showing the molecular effect on *atria*, it has been previously  
255 demonstrated that androgens, including DHT, induce a hypertrophic response in *ventricular*  
256 cardiomyocytes (12). One of the genes consistently elevated in atrial expression after DHT  
257 exposure was insulin growth factor 1 (*Igf1*), a known driver of (cardiac) muscle growth (56,

258 57). *Igf1* mRNA expression was also found to contribute to atrial fibrotic remodelling and AF  
259 inducibility in a rodent model (58). *IGF1*, containing an androgen response element within its  
260 promoter region (59), is a well-established target of androgen-receptor mediated gene  
261 activation. To our knowledge, we are the first to show that supraphysiological plasma DHT  
262 concentration can induce upregulation of *Igf1* transcript levels in atria. Further evidence of the  
263 pro-hypertrophic atrial gene response to DHT exposure can be based on the downregulation  
264 of the lncRNA Myosin heavy chain associated RNA transcript (*Mhrt*). Repression of *Mhrt*  
265 expression has previously been established as a prerequisite for stress-induced, pathological  
266 cardiac hypertrophy and restoring *Mhrt* expression levels protected murine hearts from  
267 pressure overload-induced hypertrophy (60). *Mhrt* has been shown to inhibit expression of  
268 the transcription factor myocardin (*Myocd*) (61) and increased *Myocd* expression in peripheral  
269 blood cells of patients has been associated with increased ventricular mass (62). In  
270 accordance with this, down-regulation of *Mhrt* expression upon DHT exposure was paralleled  
271 by upregulation of *Myocd* expression compared to control groups. Since we were not able to  
272 demonstrate a significant increase in atrial cell diameter in histology at the investigated time  
273 point, but were able to demonstrate increased cell capacitance in atrial cardiomyocytes on  
274 single cell level as well as atrial area dilation, we propose that the atrial hypertrophic growth  
275 response to DHT seen is of an eccentric nature.

### 276 **Reduced plakoglobin decreases left atrial Na<sub>v</sub>1.5 cluster availability at the membrane in** 277 **response to pro-hypertrophic DHT exposure**

278 Super-resolution imaging and electrophysiological techniques suggest that Na<sub>v</sub>1.5 spatial  
279 sarcolemmal localization is not random, but rather characterized by formation of distinct  
280 clusters (63, 64). To our knowledge, this the first study to evaluate the molecular arrangement  
281 of sarcolemma-localized Na<sub>v</sub>1.5 channels in atria through the use of dSTORM to allow for  
282 visualisation at nanometer resolution (localisation accuracy estimated to be within 20-30 nm).  
283 This confirmed that the mismatch between cell size and I<sub>Na</sub> density following DHT exposure in  
284 Plako<sup>+/-</sup> left atria was due to reduced membrane Na<sub>v</sub>1.5 channel number and/or defective

285 cluster availability. Interestingly, the values we estimate for next-neighbour distance,  
286 calculated from cluster density in WT cells, are slightly lower than those reported employing  
287 similar super-resolution methods in ventricular cardiac myocytes (64), suggesting slightly  
288 higher cluster densities in atrial cardiomyocytes.

289 The number of plasma membrane-localized Na<sub>v</sub>1.5 detections was reduced in left atrial  
290 cardiomyocytes obtained from Plako<sup>+/-</sup> DHT and showed a similar trend in Plako<sup>+/-</sup> control. A  
291 link between plakoglobin and Na<sub>v</sub>1.5 channel incorporation/trafficking into the cell membrane  
292 at the intercalated disc has been reported in ventricles (65, 66). Interactions of desmosomal  
293 and intercalated disc proteins with sodium channel complex have been demonstrated in  
294 ventricles previously (67) and loss or mutations of the desmosomal components plakophilin-2  
295 and desmoglein-2 were associated with reduced sodium current in different cell and murine  
296 models (67-69). A mismatch in cell size and Na<sub>v</sub>1.5 cluster availability could have implications  
297 for other cardiomyopathies and pathological hypertrophy (70, 71). Understanding the role of  
298 ion channel cluster properties is in its infancy, but our observations are consistent with other  
299 recent studies reporting a reduced I<sub>Na</sub> in response to changes in single-molecule Na<sub>v</sub>1.5  
300 organisation (72, 73).

### 301 **Implications for patients and athletes**

302 Our results show that atrial arrhythmias are an important clinical feature of ARVC and confirm  
303 male patients are more likely to show a full ARVC phenotype. We demonstrate a previously  
304 unknown interaction between defective desmosomal gene expression and exposure to  
305 androgenic anabolic steroids (AAS) in atria. This may partially explain the occurrence of atrial  
306 conduction slowing and arrhythmias (74-76) in athletes abusing AAS to enhance their  
307 performance. Based on our results, searching for desmosomal gene defects in steroid  
308 abusers with atrial arrhythmias seems warranted. Such analyses may add to a better  
309 understanding of the cardiac damage observed in some of these patients.



310 Our data, gained from well-controlled murine experiments, demonstrate that reduced  
311 expression of plakoglobin, as commonly observed in cardiac tissue of patients with  
312 pathogenic mutations in a variety of desmosomal genes (77), renders atria susceptible to  
313 AAS-induced pathology. Prevention of atrial arrhythmias in arrhythmogenic cardiomyopathies  
314 is of interest also because they can give rise to inappropriate defibrillator shocks in affected  
315 patients (4, 78) and compromise cardiac function.

316 We here add exposure to DHT to the list of stimuli aggravating pro-arrhythmic phenotypes in  
317 carriers of desmosomal mutations and demonstrate that this affects atrial electrical function.

318 Our data also provide an explanation for the stronger phenotypic expression in male gene  
319 carriers with desmosomal mutations and the observed worsened clinical outcome in ARVC  
320 patients with high physiological testosterone levels (20, 22-25).

## 321 Methods

322 See supplement for full methods.

### 323 **Patient record screening for atrial arrhythmias and semi-automated analysis of digital** 324 **electrocardiograms (ECGs) from ARVC patients**

325 Adult ARVC patients (>18 years of age) seen at a specialty clinic at a tertiary centre between  
326 2010 and 2021 were classified into two disease severity groups: non-definite and definite  
327 cases based on 2010 ARVC Task Force Criteria (TFC) (1).

328 Clinical records were retrospectively reviewed to obtain information from several modalities  
329 including imaging, electrophysiology, histopathology, genetic testing and family history, to  
330 cumulatively fulfil a diagnostic classification. Patients exhibiting signs of confirmed disease  
331 based on specific combinations of minor or major criteria were classified as the “definite”  
332 group. Individuals exhibiting signs on diagnostic investigation congruous with the 2010 TFC  
333 as “borderline” or “possible” ARVC were cumulatively considered as the “non-definite” group,  
334 as they do not confer a confirmed diagnosis of ARVC. Non-definite cases were included in  
335 the analysis to represent individuals in the earlier phases of disease, with a less severe  
336 profile of phenotypic expression. Atrial fibrillation and flutter status was extracted from  
337 previous electrocardiograms (ECG) and clinical letters.

338 Digital ECG recordings (10 seconds, sampling frequency 500 Hz) from the most recent  
339 follow-up in Inherited Cardiac Conditions Clinic were collated and analyzed using Matlab and  
340 BioSigKit (<https://doi.org/10.21105/joss.00671>). To discern the extent of atrial involvement in  
341 definite ARVC patients in comparison with non-definite patients as well as controls, family  
342 members of index patients without meeting TFC and/or exclusion of ARVC pathogenic  
343 variants attained from targeted gene panel testing, were additionally included (“Control”).

344 Digital ECG analysis was performed by three independent observers in recordings displaying  
345 sinus rhythm applying a custom-designed, semi-automated algorithm. ECGs were digitally  
346 filtered between 0.5 and 50 Hz and using a Chebyshev type II filter. The R wave was

347 automatically identified, and all complexes within the recording were averaged to improve  
348 signal quality. The isoelectric line was defined from P wave start to end.

### 349 **Animal husbandry**

350 Wildtype (WT) and plakoglobin deficient (Plako<sup>+/-</sup>) littermate male mice (28), 129/Sv  
351 background, were housed in individually ventilated cages, (2-7 mice/ cage), monitored daily  
352 under standard conditions: 12 h light/dark cycle, 22±2 °C and 55±10% humidity. Food and  
353 water were available *ad libitum*.

### 354 **Chronic DHT exposure in the murine model and experimental timeline**

355 Young adult male mice (8-11 weeks) were assigned to either DHT or placebo/control  
356 treatment groups in mixed cages and were fitted with subcutaneous osmotic mini-pumps  
357 (Alzet 2006), containing either DHT (62.5 mg/mL in ethanol), or solvent alone (Control, Ctr),  
358 for 6 weeks (Figure 2). Age and DHT exposure time were matched for all groups. At least 40  
359 minutes before pump implantation, mice were subcutaneously injected with 0.05 mL  
360 of Buprenorphine. Pump implant was performed under anaesthesia with isoflurane inhalation  
361 (max. 4%) in O<sub>2</sub> with a flow rate of 1-2 L/min. Animal handling staff and investigators were  
362 blinded to genotype and treatment. Echocardiography and ECG recording was performed at  
363 6 weeks exposure. Murine hearts were then extracted by thoracotomy under deep terminal  
364 anaesthesia (4-5% isoflurane in O<sub>2</sub>, flow rate 1-2 L/min.), and used for *in organ* and *in vitro*  
365 experimental analysis.

### 366 **Anabolic androgenic steroid measurements**

367 Murine serum DHT concentrations were determined by ultra-performance liquid  
368 chromatography-tandem mass spectrometry (LC-MS/MS) (Waters, Milford, MA, USA) as  
369 described before (79).

### 370 **Murine awake ECG measurements**

371 Murine ECGs were recorded from awake mice using a tunnel system (ecgTunnel, EMKA  
372 Technologies, France) as reported previously (80). Analyses were performed on compound  
373 potentials averaged from 20 beats taken at three time-points throughout a 5-min recording  
374 with comparable heart rates between groups using the EMKA ECG analysis software.  
375 Obtained values were then averaged per animal. For P-wave duration the monophasic part of  
376 the P-wave was only taken from ECGs displaying a stable isoelectric line.

### 377 **Optical mapping of murine left atria**

378 Activation and action potential duration (APD) maps were generated from isolated left atria  
379 loaded with the voltage-sensitive dye Di-4-ANEPPS (17.5  $\mu$ M; Cambridge Bioscience, CA,  
380 USA), paced over a range of 120-80 ms cycle length (CL) as described (81-83). To analyze  
381 conduction changes in more detail, beat-to-beat variability in whole tissue activation times  
382 was evaluated during rapid physiological pacing. To do this, 10 individual activation maps  
383 were compared from the final 10 beats of a train of 50 pulses at 80 ms CL (84).

### 384 **Murine echocardiography**

385 Echocardiography was performed with a dedicated small animal system (Vevo 2100;  
386 Visualsonics Fujifilm, Toronto, Ont, Canada) under light anaesthesia (0.5-2% isoflurane in O<sub>2</sub>)  
387 at a target heart rate of 390-440 bpm (27, 85-87). The investigators were blinded to intervention  
388 and genotype. Images were analyzed by a second blinded observer.

### 389 **Transmembrane action potential recordings**

390 Transmembrane action potentials were recorded from isolated, superfused murine left atria  
391 as described previously (81-83, 88).

### 392 **Cellular electrophysiology**

393 Individual murine left atrial cardiac myocytes were isolated by perfusion with a Tyrode's  
394 enzyme solution containing 20  $\mu$ g/mL Liberase™ (Roche, Indianapolis, IN) or a

395 collagenase+protease mix, 20 mM taurine and 30  $\mu$ M CaCl<sub>2</sub>, via Langendorff over a period of  
396 10-15 min (81, 83). I<sub>Na</sub> were evoked in voltage-clamp mode using standard protocols and low  
397 Na<sup>+</sup> solution (89). All currents were normalized to cell capacitance.

### 398 **Murine atrial fiber size and collagen composition**

399 10  $\mu$ m left atrial transverse sections were stained with FITC-conjugated wheat germ  
400 agglutinin (lectin) and cell diameter as well as endomysial fibrosis were quantified using an  
401 automated analysis tool (90).

### 402 **Super-resolution microscopy and Na<sub>v</sub>1.5 cluster analysis**

403 Freshly isolated murine left atrial cardiac myocytes were plated on 10mm diameter laminin-  
404 coated coverslips (Mattek, 35 mm dish, 1.5# coverglass), fixed, permeabilized and blocked.  
405 Cells were stained with primary rabbit anti-Na<sub>v</sub>1.5 antibody (ASC-005, 1:50, Alomone  
406 Laboratories, Jerusalem, Israel) and after additional washing and blocking they were  
407 incubated in secondary antibody (F(ab')<sub>2</sub>- Goat anti-Rabbit IgG, Alexa Fluor 647, A212-56,  
408 1:1000, ThermoFisher Scientific, Waltham, MA, USA). Direct stochastic optical reconstruction  
409 microscopy (dSTORM) (91) experiments were performed on a NIKON Eclipse Ti inverted N-  
410 STORM microscope equipped with a NIKON APO 100 x 1.49 NA total internal reflection  
411 fluorescence (TIRF) oil immersion objective. Immunolabelled samples were imaged in 0.5  
412 mg/mL glucose oxidase, 40  $\mu$ g/mL catalase, 10% wt/vol glucose and 100 mM MEA in PBS,  
413 pH 7.4 to induce Alexa 647 blinking. During dSTORM acquisition, the sample was  
414 continuously illuminated at 640 nm for 20,000 frames. Final rendered images of the localized  
415 molecules were generated using ThunderSTORM (92) and false coloured in FIJI. Final  
416 detections were subjected to a segmentation protocol, using a persistence-based clustering  
417 approach (93).

#### 418 **RNA sequencing of murine left atria**

419 Poly(A) mRNA-enriched libraries were sequenced 75 cycles in a single read mode on the  
420 NextSeq-500 System (v2.5 Chemistry, Illumina). Acquired data was trimmed and FASTQ files  
421 were aligned using HISAT2 (version 2.1.0; ref Pertea) and the reference genome Ensembl  
422 Mus Musculus GRCm38. Differential expression analysis were performed in R ([http://www.R-](http://www.R-project.org/)  
423 [project.org/](http://www.R-project.org/), R 3.4.1) using the DESeq2 package (94). Differential expression with a false  
424 discovery rate <0.05 was deemed significant. Results were visualized using R.

#### 425 **Statistics**

426 All experiments and analyses were performed blinded to genotype and treatment. Data from  
427 murine studies was first subjected to outlier analysis, ROUT method, based around a false  
428 discovery rate, where  $\alpha = 0.01$  and outliers were removed (Prism v8, GraphPad Software, La  
429 Jolla, CA, USA). Associations between categorical variables were analyzed by Fisher's exact  
430 test. Significance between groups for normally distributed data was taken as  $p < 0.05$ , ordinary  
431 one-way or two-way (repeated) measures ANOVA, with Bonferroni's post hoc test, as  
432 appropriate. Non-normally distributed data was subjected to Kruskal-Wallis with significance  
433 level of  $p < 0.05$  and Dunn's post hoc test (Prism v8, GraphPad Software, La Jolla, CA, USA).

#### 434 **Study approval**

435 Ethical approval for analysis of clinical data from Inherited Cardiac Conditions clinic at the  
436 University Hospital Queen Elisabeth, Birmingham, was granted by the local department of  
437 research ethics at UHB Hospital (Audit number CARMS-16044).

438 All animal procedures were approved by the UK Home Office (PPL number 30/2967 and  
439 PFDAAF77F) and by the institutional review board of University of Birmingham, UK. All  
440 animal procedures conformed to the guidelines from Directive 2010/63/EU of the European  
441 Parliament on the protection of animals used for scientific purposes.

## 442 **Author contributions**

443 LCS performed murine *in vivo* experiments, dSTORM experiments and analysis, gravimetry  
444 and histology analysis, RNAseq analysis, P wave analysis in human ECGs and wrote the  
445 manuscript. APH performed and analyzed microelectrode, optical mapping, patchclamp and  
446 dSTORM studies, performed gravimetry analysis and wrote the manuscript. TYY and COS  
447 set up and performed and analyzed optical mapping experiments. DMK designed dSTORM  
448 experiments and trained LCS and APH. JMP generated cluster analysis workflows. TW and  
449 PMM performed histology. FS codesigned experiments and trained TW, TYY, SNK. AA and  
450 TK screened clinical records according to Task Force Criteria. LCS, TK and COS performed  
451 semi-automated patient ECG analysis. CH prepared RNA samples and co-supervised PMM.  
452 VRC and GVG analyzed RNAseq. MS and AW performed and analyzed RNAseq. SNK and  
453 SBS performed *in vivo* experiments and gravimetry. MOR co-supervised TK. LFo analyzed *in*  
454 *vivo* experiments. SL trained LCS and co-supervised PMM. AK performed mass spectrometry  
455 of serum DHT concentrations. WA and GGL advised on AAS experimental design, DP co-  
456 supervised COS, RS co-supervised AA, KG co-supervised LCS. PK provided input  
457 throughout and co-supervised APH, FS, CH, VRC. LFa (co)-supervised LCS, APH, TYY,  
458 COS, TW, FS, AA, TK, VRC, SNK, CH, PMM, SBS, MOR, LFo, designed and coordinated the  
459 study and wrote the manuscript. All authors reviewed the results, revised the manuscript and  
460 approved the final version of it.

## 461 **Acknowledgements**

462 We thank Clara Apicella, Olivia Grech, Pushpa Patel, Genna Riley, and staff of BMSU  
463 Birmingham for expert support. We thankfully acknowledge the Centre of Membrane Proteins  
464 and Receptors COMPARE ([www.birmingham-nottingham.ac.uk/compare](http://www.birmingham-nottingham.ac.uk/compare)) for both their  
465 expertise and infrastructure. We thank the Core Facility Genomics of the Medical Faculty  
466 Münster, University of Muenster. We thank all members of the Translational Research in  
467 Heart Failure and Arrhythmias Cluster for discussion.

468 This work was partially supported by European Union (grant agreement No 633196 [CATCH  
469 ME] to PK and LF), European Union BigData@Heart (grant agreement EU IMI 116074),  
470 British Heart Foundation (FS/13/43/30324 to PK and LF; PG/17/30/32961 to PK and APH,  
471 PG/20/22/35093 to PK; AA/18/2/34218 to PK and LF; FS/12/40/29712 to KG), German  
472 Centre for Cardiovascular Research supported by the German Ministry of Education and  
473 Research (DZHK to PK); Leducq Foundation to PK; UOB research development fund (LF).  
474 TYY studentship was supported by PSIBS to LF. Funding from the Wellcome Trust was  
475 received by KG (201543/B/16/Z) and WA (WT209492/Z/17/Z). KG is also funded by the MRC  
476 (MR/V009540/1). The Institute of Cardiovascular Sciences is a recipient of a BHF Accelerator  
477 Award (AA/18/2/34218).

478 GVG acknowledges support from the NIHR Birmingham ECMC, NIHR Birmingham SRMRC,  
479 Nanocommons H2020-EU (731032) and the MRC Heath Data Research UK  
480 (HDRUK/CFC/01), an initiative funded by UK Research and Innovation, Department of Health  
481 and Social Care (England) and the devolved administrations, and leading medical research  
482 charities. GVG and WA receive support from the NIHR Birmingham Biomedical Research  
483 Centre. The views expressed in this publication are those of the authors and not necessarily  
484 those of the NHS, the National Institute for Health and Care Research, the Medical Research  
485 Council or the Department of Health.



## 486 References

- 487 1. Marcus FI, McKenna WJ, Sherrill D, Basso C, Bauce B, Bluemke DA, et al. Diagnosis  
488 of arrhythmogenic right ventricular cardiomyopathy/dysplasia: proposed  
489 modification of the Task Force Criteria. *European heart journal*. 2010;31(7):806-  
490 14.
- 491 2. Morita H, Kusano-Fukushima K, Nagase S, Fujimoto Y, Hisamatsu K, Fujio H, et al.  
492 Atrial fibrillation and atrial vulnerability in patients with Brugada syndrome. *J Am*  
493 *Coll Cardiol*. 2002;40(8):1437-44.
- 494 3. Tonet JL, Castro-Miranda R, Iwa T, Poulain F, Frank R, and Fontaine GH.  
495 Frequency of supraventricular tachyarrhythmias in arrhythmogenic right  
496 ventricular dysplasia. *The American journal of cardiology*. 1991;67(13):1153.
- 497 4. Camm CF, James CA, Tichnell C, Murray B, Bhonsale A, te Riele AS, et al.  
498 Prevalence of atrial arrhythmias in arrhythmogenic right ventricular  
499 dysplasia/cardiomyopathy. *Heart rhythm*. 2013;10(11):1661-8.
- 500 5. Chu AF, Zado E, and Marchlinski FE. Atrial arrhythmias in patients with  
501 arrhythmogenic right ventricular cardiomyopathy/dysplasia and ventricular  
502 tachycardia. *The American journal of cardiology*. 2010;106(5):720-2.
- 503 6. Baturova MA, Haugaa KH, Jensen HK, Svensson A, Gilljam T, Bundgaard H, et al.  
504 Atrial fibrillation as a clinical characteristic of arrhythmogenic right ventricular  
505 cardiomyopathy: Experience from the Nordic ARVC Registry. *Int J Cardiol*.  
506 2020;298:39-43.
- 507 7. Priori SG, Blomstrom-Lundqvist C, Mazzanti A, Blom N, Borggrefe M, Camm J, et al.  
508 2015 ESC Guidelines for the management of patients with ventricular  
509 arrhythmias and the prevention of sudden cardiac death: The Task Force for the  
510 Management of Patients with Ventricular Arrhythmias and the Prevention of  
511 Sudden Cardiac Death of the European Society of Cardiology (ESC). Endorsed by:  
512 Association for European Paediatric and Congenital Cardiology (AEPC). *European*  
513 *heart journal*. 2015;36(41):2793-867.
- 514 8. Sagoe D, Molde H, Andreassen CS, Torsheim T, and Pallesen S. The global  
515 epidemiology of anabolic-androgenic steroid use: a meta-analysis and meta-  
516 regression analysis. *Annals of Epidemiology*. 2014;24(5):383-98.
- 517 9. Urhausen A, Albers T, and Kindermann W. Are the cardiac effects of anabolic  
518 steroid abuse in strength athletes reversible? *Heart*. 2004;90(5):496-501.
- 519 10. Luijckx T, Velthuis BK, Backx FJG, Buckens CFM, Prakken NHJ, Rienks R, et al.  
520 Anabolic androgenic steroid use is associated with ventricular dysfunction on  
521 cardiac MRI in strength trained athletes. *International journal of cardiology*.  
522 2013;167(3):664-8.
- 523 11. Alizade E, Avci A, Fidan S, Tabakci M, Bulut M, Zehir R, et al. The Effect of Chronic  
524 Anabolic-Androgenic Steroid Use on Tp-E Interval, Tp-E/Qt Ratio, and Tp-E/Qtc  
525 Ratio in Male Bodybuilders. *Ann Noninvasive Electrocardiol*. 2015;20(6):592-600.
- 526 12. Marsh JD, Lehmann MH, Ritchie RH, Gwathmey JK, Green GE, and Schiebinger RJ.  
527 Androgen receptors mediate hypertrophy in cardiac myocytes. *Circulation*.  
528 1998;98(3):256-61.
- 529 13. Medei E, Marocolo M, Rodrigues DD, Arantes PC, Takiya CM, Silva J, et al. Chronic  
530 treatment with anabolic steroids induces ventricular repolarization disturbances:  
531 Cellular, ionic and molecular mechanism. *Journal of molecular and cellular*  
532 *cardiology*. 2010;49(2):165-75.

- 533 14. Pirompol P, Teekabut V, Weerachatanukul W, Bupha-Intr T, and  
534 Wattanapermpool J. Supra-physiological dose of testosterone induces  
535 pathological cardiac hypertrophy. *J Endocrinol*. 2016;229(1):13-23.
- 536 15. Berger D, Folsom AR, Schreiner PJ, Chen LY, Michos ED, O'Neal WT, et al. Plasma  
537 total testosterone and risk of incident atrial fibrillation: The Atherosclerosis Risk  
538 in Communities (ARIC) study. *Maturitas*. 2019;125:5-10.
- 539 16. Sullivan ML, Martinez CM, and Gallagher EJ. Atrial fibrillation and anabolic  
540 steroids. *J Emerg Med*. 1999;17(5):851-7.
- 541 17. Tsai WC, Lee TI, Chen YC, Kao YH, Lu YY, Lin YK, et al. Testosterone replacement  
542 increases aged pulmonary vein and left atrium arrhythmogenesis with enhanced  
543 adrenergic activity. *International journal of cardiology*. 2014;176(1):110-8.
- 544 18. Lau DH, Stiles MK, John B, Shashidhar, Young GD, and Sanders P. Atrial fibrillation  
545 and anabolic steroid abuse. *Int J Cardiol*. 2007;117(2):e86-7.
- 546 19. Rootwelt-Norberg C, Lie OH, Chivulescu M, Castrini AI, Sarvari SI, Lyseggen E, et  
547 al. Sex differences in disease progression and arrhythmic risk in patients with  
548 arrhythmogenic cardiomyopathy. *Europace : European pacing, arrhythmias, and*  
549 *cardiac electrophysiology : journal of the working groups on cardiac pacing,*  
550 *arrhythmias, and cardiac cellular electrophysiology of the European Society of*  
551 *Cardiology*. 2021;23(7):1084-91.
- 552 20. Akdis D, Saguner AM, Shah K, Wei C, Medeiros-Domingo A, von Eckardstein A, et  
553 al. Sex hormones affect outcome in arrhythmogenic right ventricular  
554 cardiomyopathy/dysplasia: from a stem cell derived cardiomyocyte-based model  
555 to clinical biomarkers of disease outcome. *European heart journal*. 2017.
- 556 21. Wilde AAM, Semsarian C, Marquez MF, Sepehri Shamloo A, Ackerman MJ, Ashley  
557 EA, et al. European Heart Rhythm Association (EHRA)/Heart Rhythm Society  
558 (HRS)/Asia Pacific Heart Rhythm Society (APHRS)/Latin American Heart Rhythm  
559 Society (LAHRS) Expert Consensus Statement on the State of Genetic Testing for  
560 Cardiac Diseases. *Heart rhythm*. 2022.
- 561 22. Asimaki A, Syrris P, Wichter T, Matthias P, Saffitz JE, and McKenna WJ. A novel  
562 dominant mutation in plakoglobin causes Arrhythmogenic right ventricular  
563 cardiomyopathy. *American journal of human genetics*. 2007;81(5):964-73.
- 564 23. Protonotarios N, Tsatsopoulou A, Anastasakis A, Sevdalis E, McKoy G, Stratos K, et  
565 al. Genotype-phenotype assessment in autosomal recessive arrhythmogenic right  
566 ventricular cardiomyopathy (Naxos disease) caused by a deletion in plakoglobin.  
567 *Journal of the American College of Cardiology*. 2001;38(5):1477-84.
- 568 24. Antoniadou L, Tsatsopoulou A, Anastasakis A, Syrris P, Asimaki A, Panagiotakos D,  
569 et al. Arrhythmogenic right ventricular cardiomyopathy caused by deletions in  
570 plakophilin-2 and plakoglobin (Naxos disease) in families from Greece and  
571 Cyprus: genotype-phenotype relations, diagnostic features and prognosis.  
572 *European heart journal*. 2006;27(18):2208-16.
- 573 25. McKoy G, Protonotarios N, Crosby A, Tsatsopoulou A, Anastasakis A, Coonar A, et  
574 al. Identification of a deletion in plakoglobin in arrhythmogenic right ventricular  
575 cardiomyopathy with palmoplantar keratoderma and woolly hair (Naxos  
576 disease). *Lancet (London, England)*. 2000;355(9221):2119-24.
- 577 26. Li J, Swope D, Raess N, Cheng L, Muller EJ, and Radice GL. Cardiac tissue-restricted  
578 deletion of plakoglobin results in progressive cardiomyopathy and activation of  
579  $\beta$ -catenin signaling. *Mol Cell Biol*. 2011;31(6):1134-44.
- 580 27. Fabritz L, Hoogendijk MG, Scicluna BP, van Amersfoort SC, Fortmueller L, Wolf S,  
581 et al. Load-reducing therapy prevents development of arrhythmogenic right

- 582 ventricular cardiomyopathy in plakoglobin-deficient mice. *J Am Coll Cardiol.*  
583 2011;57(6):740-50.
- 584 28. Kirchhof P, Fabritz L, Zwiener M, Witt H, Schafers M, Zellerhoff S, et al. Age- and  
585 training-dependent development of arrhythmogenic right ventricular  
586 cardiomyopathy in heterozygous plakoglobin-deficient mice. *Circulation.*  
587 2006;114(17):1799-806.
- 588 29. Weinsaft JW, Kochav JD, Kim J, Gurevich S, Volo SC, Afroz A, et al. P wave area for  
589 quantitative electrocardiographic assessment of left atrial remodeling. *PLoS One.*  
590 2014;9(6):e99178.
- 591 30. Magnani JW, Zhu L, Lopez F, Pencina MJ, Agarwal SK, Soliman EZ, et al. P-wave  
592 indices and atrial fibrillation: cross-cohort assessments from the Framingham  
593 Heart Study (FHS) and Atherosclerosis Risk in Communities (ARIC) study. *Am*  
594 *Heart J.* 2015;169(1):53-61 e1.
- 595 31. Soliman EZ, Prineas RJ, Case LD, Zhang ZM, and Goff DC, Jr. Ethnic distribution of  
596 ECG predictors of atrial fibrillation and its impact on understanding the ethnic  
597 distribution of ischemic stroke in the Atherosclerosis Risk in Communities (ARIC)  
598 study. *Stroke; a journal of cerebral circulation.* 2009;40(4):1204-11.
- 599 32. Gorenk B, Birdane A, Kudaiberdieva G, Goktekin O, Cavusoglu Y, Unalir A, et al. P  
600 wave amplitude and duration may predict immediate recurrence of atrial  
601 fibrillation after internal cardioversion. *Ann Noninvasive Electrocardiol.*  
602 2003;8(3):215-8.
- 603 33. Kirchhof P. The future of atrial fibrillation management: integrated care and  
604 stratified therapy. *Lancet.* 2017;390(10105):1873-87.
- 605 34. Baturova MA, Svensson A, Aneq MA, Svendsen JH, Risum N, Sherina V, et al.  
606 Evolution of P-wave indices during long-term follow-up as markers of atrial  
607 substrate progression in arrhythmogenic right ventricular cardiomyopathy.  
608 *Europace : European pacing, arrhythmias, and cardiac electrophysiology : journal*  
609 *of the working groups on cardiac pacing, arrhythmias, and cardiac cellular*  
610 *electrophysiology of the European Society of Cardiology.* 2021;23(23 Suppl 1):i29-  
611 i37.
- 612 35. Heijman J, Guichard JB, Dobrev D, and Nattel S. Translational Challenges in Atrial  
613 Fibrillation. *Circulation research.* 2018;122(5):752-73.
- 614 36. van Rijen HV, and de Bakker JM. Penetrance of monogenetic cardiac conduction  
615 diseases. A matter of conduction reserve? *Cardiovasc Res.* 2007;76(3):379-80.
- 616 37. van Rijen HV, de Bakker JM, and van Veen TA. Hypoxia, electrical uncoupling, and  
617 conduction slowing: Role of conduction reserve. *Cardiovasc Res.* 2005;66(1):9-11.
- 618 38. Campian ME, Verberne HJ, Hardziyenka M, de Groot EA, van Moerkerken AF, van  
619 Eck-Smit BL, et al. Assessment of inflammation in patients with arrhythmogenic  
620 right ventricular cardiomyopathy/dysplasia. *Eur J Nucl Med Mol Imaging.*  
621 2010;37(11):2079-85.
- 622 39. Chelko SP, Asimaki A, Lowenthal J, Bueno-Beti C, Bedja D, Scalco A, et al.  
623 Therapeutic Modulation of the Immune Response in Arrhythmogenic  
624 Cardiomyopathy. *Circulation.* 2019.
- 625 40. Frustaci A, Chimenti C, Bellocci F, Morgante E, Russo MA, and Maseri A.  
626 Histological substrate of atrial biopsies in patients with lone atrial fibrillation.  
627 *Circulation.* 1997;96(4):1180-4.
- 628 41. Chung MK, Martin DO, Sprecher D, Wazni O, Kanderian A, Carnes CA, et al. C-  
629 reactive protein elevation in patients with atrial arrhythmias: inflammatory

- 630 mechanisms and persistence of atrial fibrillation. *Circulation*. 2001;104(24):2886-  
631 91.
- 632 42. Aviles RJ, Martin DO, Apperson-Hansen C, Houghtaling PL, Rautaharju P, Kronmal  
633 RA, et al. Inflammation as a risk factor for atrial fibrillation. *Circulation*.  
634 2003;108(24):3006-10.
- 635 43. Xu J, Cui G, Esmailian F, Plunkett M, Marelli D, Ardehali A, et al. Atrial extracellular  
636 matrix remodeling and the maintenance of atrial fibrillation. *Circulation*.  
637 2004;109(3):363-8.
- 638 44. Boldt A, Wetzel U, Lauschke J, Weigl J, Gummert J, Hindricks G, et al. Fibrosis in  
639 left atrial tissue of patients with atrial fibrillation with and without underlying  
640 mitral valve disease. *Heart*. 2004;90(4):400-5.
- 641 45. Marcus FI, Fontaine GH, Guiraudon G, Frank R, Laurenceau JL, Malergue C, et al.  
642 Right ventricular dysplasia: a report of 24 adult cases. *Circulation*.  
643 1982;65(2):384-98.
- 644 46. Thiene G, Corrado D, Nava A, Rossi L, Poletti A, Boffa GM, et al. Right ventricular  
645 cardiomyopathy: is there evidence of an inflammatory aetiology? *European heart*  
646 *journal*. 1991;12 Suppl D:22-5.
- 647 47. Galan M, Varona S, Guadall A, Orriols M, Navas M, Aguilo S, et al. Lysyl oxidase  
648 overexpression accelerates cardiac remodeling and aggravates angiotensin II-  
649 induced hypertrophy. *FASEB J*. 2017;31(9):3787-99.
- 650 48. Lu C, Ren D, Wang X, Ha T, Liu L, Lee EJ, et al. Toll-like receptor 3 plays a role in  
651 myocardial infarction and ischemia/reperfusion injury. *Biochimica et biophysica*  
652 *acta*. 2014;1842(1):22-31.
- 653 49. Liu L, Wang Y, Cao ZY, Wang MM, Liu XM, Gao T, et al. Up-regulated TLR4 in  
654 cardiomyocytes exacerbates heart failure after long-term myocardial infarction. *J*  
655 *Cell Mol Med*. 2015;19(12):2728-40.
- 656 50. Okamura Y, Watari M, Jerud ES, Young DW, Ishizaka ST, Rose J, et al. The extra  
657 domain A of fibronectin activates Toll-like receptor 4. *J Biol Chem*.  
658 2001;276(13):10229-33.
- 659 51. Verheule S, Sato T, Everett T, Engle SK, Otten D, von der Lohe MR, et al. Increased  
660 vulnerability to atrial fibrillation in transgenic mice with selective atrial fibrosis  
661 caused by overexpression of TGF-beta 1. *Circulation research*. 2004;94(11):1458-  
662 65.
- 663 52. Fabritz L, and Kirchhof P. Selective atrial profibrotic signalling in mice and man.  
664 *Cardiovasc Res*. 2013;99(4):592-4.
- 665 53. Papamitsou T, Barlagiannis D, Papaliagkas V, Kotanidou E, and Dermentzopoulou-  
666 Theodoridou M. Testosterone-induced hypertrophy, fibrosis and apoptosis of  
667 cardiac cells--an ultrastructural and immunohistochemical study. *Med Sci Monit*.  
668 2011;17(9):BR266-73.
- 669 54. Akhmetshina A, Dees C, Pileckyte M, Szucs G, Spriewald BM, Zwerina J, et al. Rho-  
670 associated kinases are crucial for myofibroblast differentiation and production of  
671 extracellular matrix in scleroderma fibroblasts. *Arthritis Rheum*.  
672 2008;58(8):2553-64.
- 673 55. Ongherth A, Pasch S, Wuertz CM, Nowak K, Kittana N, Weis CA, et al. p63RhoGEF  
674 regulates auto- and paracrine signaling in cardiac fibroblasts. *J Mol Cell Cardiol*.  
675 2015;88:39-54.
- 676 56. Kim J, Wende AR, Sena S, Theobald HA, Soto J, Sloan C, et al. Insulin-like growth  
677 factor I receptor signaling is required for exercise-induced cardiac hypertrophy.  
678 *Mol Endocrinol*. 2008;22(11):2531-43.

- 679 57. Weeks KL, Bernardo BC, Ooi JYY, Patterson NL, and McMullen JR. The IGF1-PI3K-  
680 Akt Signaling Pathway in Mediating Exercise-Induced Cardiac Hypertrophy and  
681 Protection. *Adv Exp Med Biol.* 2017;1000:187-210.
- 682 58. Wang J, Li Z, Du J, Li J, Zhang Y, Liu J, et al. The expression profile analysis of atrial  
683 mRNA in rats with atrial fibrillation: the role of IGF1 in atrial fibrosis. *BMC*  
684 *Cardiovasc Disord.* 2019;19(1):40.
- 685 59. Wu Y, Zhao W, Zhao J, Pan J, Wu Q, Zhang Y, et al. Identification of androgen  
686 response elements in the insulin-like growth factor I upstream promoter.  
687 *Endocrinology.* 2007;148(6):2984-93.
- 688 60. Han P, Li W, Lin CH, Yang J, Shang C, Nuernberg ST, et al. A long noncoding RNA  
689 protects the heart from pathological hypertrophy. *Nature.* 2014;514(7520):102-6.
- 690 61. Luo Y, Xu Y, Liang C, Xing W, and Zhang T. The mechanism of myocardial  
691 hypertrophy regulated by the interaction between mhrt and myocardin. *Cell*  
692 *Signal.* 2018;43:11-20.
- 693 62. Kontaraki JE, Parthenakis FI, Patrianakos AP, Karalis IK, and Vardas PE. Altered  
694 expression of early cardiac marker genes in circulating cells of patients with  
695 hypertrophic cardiomyopathy. *Cardiovasc Pathol.* 2007;16(6):329-35.
- 696 63. Bhargava A, Lin XM, Novak P, Mehta K, Korchev Y, Delmar M, et al. Super-  
697 resolution Scanning Patch Clamp Reveals Clustering of Functional Ion Channels in  
698 Adult Ventricular Myocyte. *Circulation research.* 2013;112(8):1112-+.
- 699 64. Leo-Macias A, Agullo-Pascual E, Sanchez-Alonso JL, Keegan S, Lin XM, Arcos T, et  
700 al. Nanoscale visualization of functional adhesion/excitability nodes at the  
701 intercalated disc. *Nature communications.* 2016;7:11.
- 702 65. Asimaki A, Kapoor S, Plovie E, Arndt AK, Adams E, Liu ZZ, et al. Identification of a  
703 New Modulator of the Intercalated Disc in a Zebrafish Model of Arrhythmogenic  
704 Cardiomyopathy. *Sci Transl Med.* 2014;6(240):15.
- 705 66. Noorman M, Hakim S, Kessler E, Groeneweg JA, Cox M, Asimaki A, et al.  
706 Remodeling of the cardiac sodium channel, connexin43, and plakoglobin at the  
707 intercalated disk in patients with arrhythmogenic cardiomyopathy. *Heart*  
708 *rhythm : the official journal of the Heart Rhythm Society.* 2013;10(3):412-9.
- 709 67. Rizzo S, Lodder EM, Verkerk AO, Wolswinkel R, Beekman L, Pilichou K, et al.  
710 Intercalated disc abnormalities, reduced Na(+) current density, and conduction  
711 slowing in desmoglein-2 mutant mice prior to cardiomyopathic changes.  
712 *Cardiovascular research.* 2012;95(4):409-18.
- 713 68. Sato PY, Musa H, Coombs W, Guerrero-Serna G, Patino GA, Taffet SM, et al. Loss of  
714 plakophilin-2 expression leads to decreased sodium current and slower  
715 conduction velocity in cultured cardiac myocytes. *Circ Res.* 2009;105(6):523-6.
- 716 69. Cerrone M, Lin X, Zhang M, Agullo-Pascual E, Pfenniger A, Chkourko Gusky H, et al.  
717 Missense mutations in plakophilin-2 cause sodium current deficit and associate  
718 with a Brugada syndrome phenotype. *Circulation.* 2014;129(10):1092-103.
- 719 70. Hofmann F, Fabritz L, Stieber J, Schmitt J, Kirchhof P, Ludwig A, et al. Ventricular  
720 HCN channels decrease the repolarization reserve in the hypertrophic heart.  
721 *Cardiovasc Res.* 2012;95(3):317-26.
- 722 71. Wagner S, Dybkova N, Rasenack EC, Jacobshagen C, Fabritz L, Kirchhof P, et al.  
723 Ca<sup>2+</sup>/calmodulin-dependent protein kinase II regulates cardiac Na<sup>+</sup> channels. *J*  
724 *Clin Invest.* 2006;116(12):3127-38.
- 725 72. Agullo-Pascual E, Lin XM, Leo-Macias A, Zhang ML, Liang FX, Li Z, et al. Super-  
726 resolution imaging reveals that loss of the C-terminus of connexin43 limits

- 727 microtubule plus-end capture and Na(V)1.5 localization at the intercalated disc.  
728 *Cardiovascular research*. 2014;104(2):371-81.
- 729 73. te Riele A, Agullo-Pascual E, James CA, Leo-Macias A, Cerrone M, Zhang ML, et al.  
730 Multilevel analyses of SCN5A mutations in arrhythmogenic right ventricular  
731 dysplasia/cardiomyopathy suggest non-canonical mechanisms for disease  
732 pathogenesis. *Cardiovascular research*. 2017;113(1):102-11.
- 733 74. Furlanello F, Serdoz LV, Cappato R, and De Ambroggi L. Illicit drugs and cardiac  
734 arrhythmias in athletes. *Eur J Cardiovasc Prev Rehabil*. 2007;14(4):487-94.
- 735 75. Akcakoyun M, Alizade E, Gundogdu R, Bulut M, Tabakci MM, Acar G, et al. Long-  
736 term anabolic androgenic steroid use is associated with increased atrial  
737 electromechanical delay in male bodybuilders. *Biomed Res Int*.  
738 2014;2014:451520.
- 739 76. Nieschlag E, and Vorona E. Doping with anabolic androgenic steroids (AAS):  
740 Adverse effects on non-reproductive organs and functions. *Rev Endocr Metab*  
741 *Disord*. 2015;16(3):199-211.
- 742 77. Asimaki A, Tandri H, Huang H, Halushka MK, Gautam S, Basso C, et al. A new  
743 diagnostic test for arrhythmogenic right ventricular cardiomyopathy. *N Engl J*  
744 *Med*. 2009;360(11):1075-84.
- 745 78. Takehara N, Makita N, Kawabe J, Sato N, Kawamura Y, Kitabatake A, et al. A  
746 cardiac sodium channel mutation identified in Brugada syndrome associated with  
747 atrial standstill. *J Intern Med*. 2004;255(1):137-42.
- 748 79. Kulle AE, Riepe FG, Melchior D, Hiort O, and Holterhus PM. A novel ultrahigh  
749 liquid chromatography tandem mass spectrometry method for the simultaneous  
750 determination of androstenedione, testosterone, and dihydrotestosterone in  
751 pediatric blood samples: age- and sex-specific reference data. *J Clin Endocrinol*  
752 *Metab*. 2010;95(5):2399-409.
- 753 80. Silbernagel N, Walecki M, Schafer MK, Kessler M, Zobeiri M, Rinne S, et al. The  
754 VAMP-associated protein VAPB is required for cardiac and neuronal pacemaker  
755 channel function. *FASEB J*. 2018;32(11):6159-73.
- 756 81. Holmes AP, Yu TY, Tull S, Syeda F, Kuhlmann SM, O'Brien S-M, et al. A Regional  
757 Reduction in Ito and IKACH in the Murine Posterior Left Atrial Myocardium Is  
758 Associated with Action Potential Prolongation and Increased Ectopic Activity. *PLoS*  
759 *one*. 2016;11(5):e0154077.
- 760 82. Yu TY, Syeda F, Holmes AP, Osborne B, Dehghani H, Brain KL, et al. An automated  
761 system using spatial oversampling for optical mapping in murine atria.  
762 Development and validation with monophasic and transmembrane action  
763 potentials. *Progress in biophysics and molecular biology*. 2014.
- 764 83. Syeda F, Holmes AP, Yu TY, Tull S, Kuhlmann SM, Pavlovic D, et al. PITX2  
765 Modulates Atrial Membrane Potential and the Antiarrhythmic Effects of Sodium-  
766 Channel Blockers. *J Am Coll Cardiol*. 2016;68(17):1881-94.
- 767 84. O'Shea C, Holmes AP, Yu TY, Winter J, Wells SP, Correia J, et al. ElectroMap: High-  
768 throughput open-source software for analysis and mapping of cardiac  
769 electrophysiology. *Scientific reports*. 2019;9(1):1389.
- 770 85. Kirchhof P, Kahr PC, Kaese S, Piccini I, Vokshi I, Scheld HH, et al. PITX2c is  
771 expressed in the adult left atrium, and reducing Pitx2c expression promotes atrial  
772 fibrillation inducibility and complex changes in gene expression. *Circ Cardiovasc*  
773 *Genet*. 2011;4(2):123-33.

- 774 86. Blana A, Kaese S, Fortmuller L, Laakmann S, Damke D, van Bragt K, et al. Knock-in  
775 gain-of-function sodium channel mutation prolongs atrial action potentials and  
776 alters atrial vulnerability. *Heart Rhythm*. 2010;7(12):1862-9.
- 777 87. Fabritz L, Kirchhof P, Fortmuller L, Auchampach JA, Baba HA, Breithardt G, et al.  
778 Gene dose-dependent atrial arrhythmias, heart block, and brady-cardiomyopathy  
779 in mice overexpressing A(3) adenosine receptors. *Cardiovasc Res*.  
780 2004;62(3):500-8.
- 781 88. Lemoine MD, Duverger JE, Naud P, Chartier D, Qi XY, Comtois P, et al.  
782 Arrhythmogenic left atrial cellular electrophysiology in a murine genetic long QT  
783 syndrome model. *Cardiovasc Res*. 2011;92(1):67-74.
- 784 89. S OB, Holmes AP, Johnson DM, Kabir SN, C OS, M OR, et al. Increased atrial  
785 effectiveness of flecainide conferred by altered biophysical properties of sodium  
786 channels. *J Mol Cell Cardiol*. 2022;166:23-35.
- 787 90. Winters J, von Braunmuhl ME, Zeemering S, Gilbers M, Brink TT, Scaf B, et al.  
788 JavaCyte, a novel open-source tool for automated quantification of key hallmarks  
789 of cardiac structural remodeling. *Scientific reports*. 2020;10(1):20074.
- 790 91. Kavanagh DM, Smyth AM, Martin KJ, Dun A, Brown ER, Gordon S, et al. A  
791 molecular toggle after exocytosis sequesters the presynaptic syntaxin1a  
792 molecules involved in prior vesicle fusion. *Nature communications*. 2014;5:14.
- 793 92. Ovesny M, Krizek P, Borkovec J, Svindrych ZK, and Hagen GM. ThunderSTORM: a  
794 comprehensive ImageJ plug-in for PALM and STORM data analysis and super-  
795 resolution imaging. *Bioinformatics*. 2014;30(16):2389-90.
- 796 93. Pike JA, Khan AO, Pallini C, Thomas SG, Mund M, Ries J, et al. Topological data  
797 analysis quantifies biological nano-structure from single molecule localization  
798 microscopy. *Bioinformatics (Oxford, England)*. 2020;36(5):1614-21.
- 799 94. Love MI, Huber W, and Anders S. Moderated estimation of fold change and  
800 dispersion for RNA-seq data with DESeq2. *Genome Biol*. 2014;15(12):550.
- 801 95. Jaoude SA, Leclercq JF, and Coumel P. Progressive ECG changes in arrhythmogenic  
802 right ventricular disease. Evidence for an evolving disease. *European heart  
803 journal*. 1996;17(11):1717-22.
- 804 96. Brembilla-Perrot B, Jacquemin L, Houplon P, Houriez P, Beurrier D, Berder V, et al.  
805 Increased atrial vulnerability in arrhythmogenic right ventricular disease. *Am  
806 Heart J*. 1998;135(5 Pt 1):748-54.
- 807 97. Peters S, Trummel M, and Meyners W. Prevalence of right ventricular dysplasia-  
808 cardiomyopathy in a non-referral hospital. *Int J Cardiol*. 2004;97(3):499-501.
- 809 98. Saguner AM, Ganahl S, Kraus A, Baldinger SH, Medeiros-Domingo A, Saguner AR,  
810 et al. Clinical role of atrial arrhythmias in patients with arrhythmogenic right  
811 ventricular dysplasia. *Circulation journal : official journal of the Japanese  
812 Circulation Society*. 2014;78(12):2854-61.
- 813 99. Wu L, Guo J, Zheng L, Chen G, Ding L, Qiao Y, et al. Atrial Remodeling and Atrial  
814 Tachyarrhythmias in Arrhythmogenic Right Ventricular Cardiomyopathy. *The  
815 American journal of cardiology*. 2016;118(5):750-3.
- 816 100. Bourfiss M, Te Riele AS, Mast TP, Cramer MJ, JF VDH, TA VANV, et al. Influence of  
817 Genotype on Structural Atrial Abnormalities and Atrial Fibrillation or Flutter in  
818 Arrhythmogenic Right Ventricular Dysplasia/Cardiomyopathy. *J Cardiovasc  
819 Electrophysiol*. 2016;27(12):1420-8.
- 820 101. Mazzanti A, Ng K, Faragli A, Maragna R, Chiodaroli E, Orphanou N, et al.  
821 Arrhythmogenic Right Ventricular Cardiomyopathy: Clinical Course and  
822 Predictors of Arrhythmic Risk. *J Am Coll Cardiol*. 2016;68(23):2540-50.

- 823 102. Gilljam T, Haugaa KH, Jensen HK, Svensson A, Bundgaard H, Hansen J, et al. Heart  
824 transplantation in arrhythmogenic right ventricular cardiomyopathy - Experience  
825 from the Nordic ARVC Registry. *Int J Cardiol.* 2018;250:201-6.
- 826 103. Wu L, Bao J, Liang E, Fan S, Zheng L, Du Z, et al. Atrial involvement in  
827 arrhythmogenic right ventricular cardiomyopathy patients referred for  
828 ventricular arrhythmias ablation. *J Cardiovasc Electrophysiol.* 2018;29(10):1388-  
829 95.
- 830 104. Mussigbrodt A, Knopp H, Efimova E, Weber A, Bertagnolli L, Hilbert S, et al.  
831 Supraventricular arrhythmias in patients with arrhythmogenic right ventricular  
832 dysplasia/cardiomyopathy associate with long-term outcome after catheter  
833 ablation of ventricular tachycardias. *Europace : European pacing, arrhythmias, and*  
834 *cardiac electrophysiology : journal of the working groups on cardiac pacing,*  
835 *arrhythmias, and cardiac cellular electrophysiology of the European Society of*  
836 *Cardiology.* 2018;20(7):1182-7.
- 837 105. Cardona-Guarache R, Astrom-Aneq M, Oesterle A, Asirvatham R, Svetlichnaya J,  
838 Marcus GM, et al. Atrial arrhythmias in patients with arrhythmogenic right  
839 ventricular cardiomyopathy: Prevalence, echocardiographic predictors, and  
840 treatment. *J Cardiovasc Electrophysiol.* 2019;30(10):1801-10.
- 841 106. Kikuchi N, Shiga T, Suzuki A, and Hagiwara N. Atrial tachyarrhythmias and heart  
842 failure events in patients with arrhythmogenic right ventricular cardiomyopathy.  
843 *Int J Cardiol Heart Vasc.* 2020;31:100669.



## Figures and figure legends

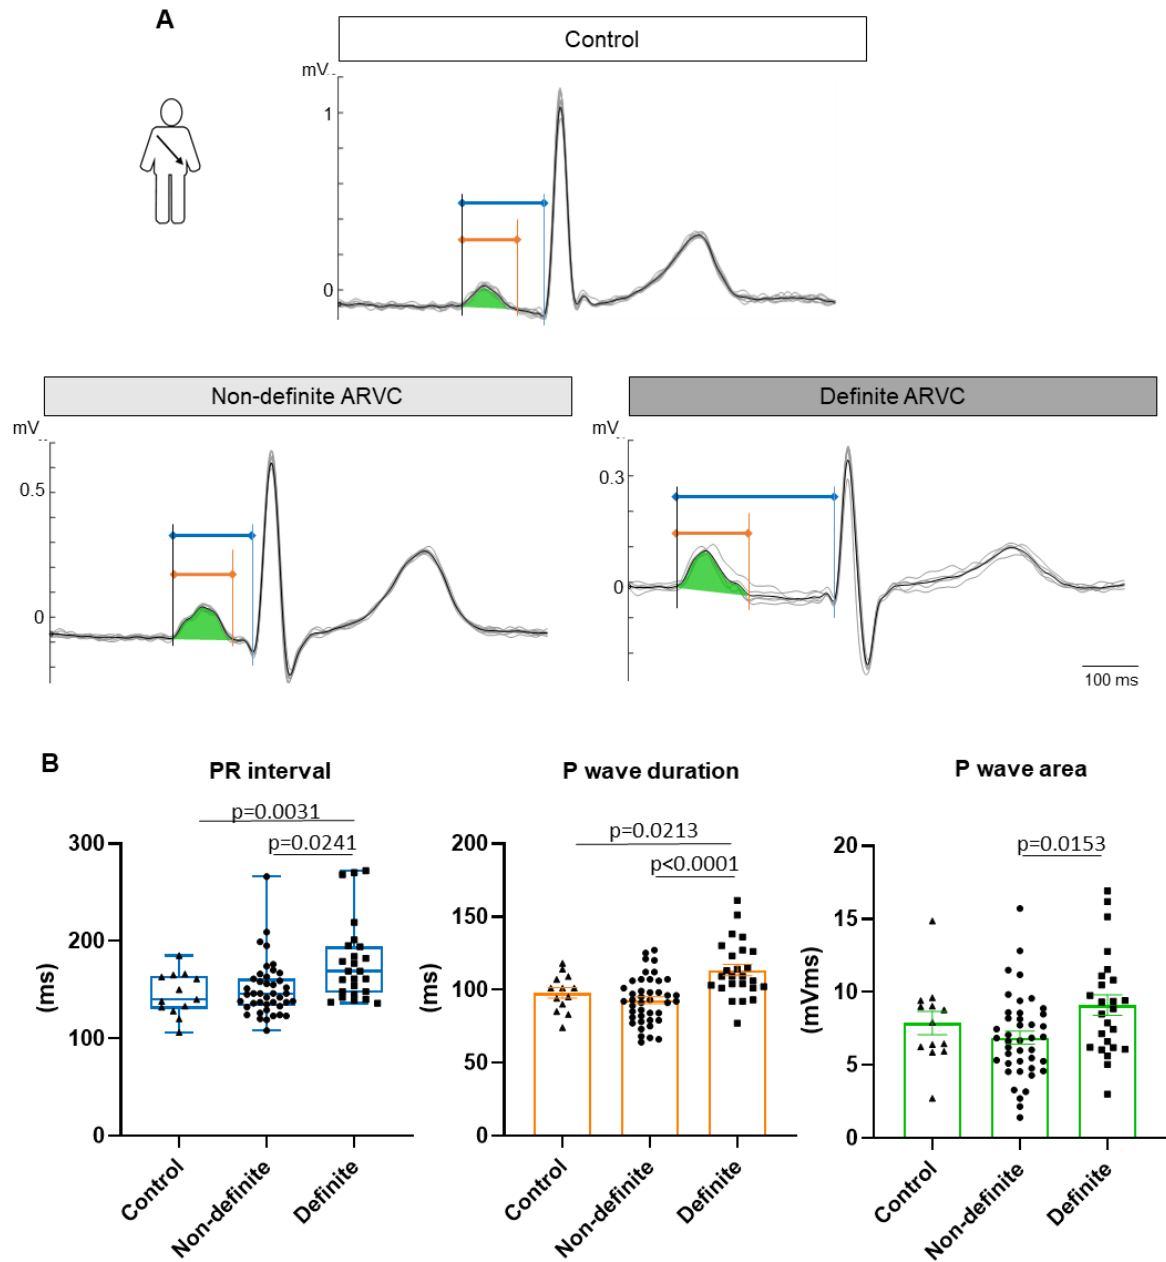

**Figure 1 - Arrhythmogenic Right Ventricular Cardiomyopathy (ARVC) patients' and control individuals' P wave characteristics derived from digital ECG analysis**

(A) Lead II ECG recordings from an unaffected (control) as well as a non-definite and definite ARVC patient. Individual cardiac cycles over a duration of 10 sec (grey traces) are overlaid by detected R waves and averaged (black trace). PR interval (blue), P wave duration (orange) and P wave area (green) are marked. (B) PR interval and P wave characteristics obtained from semi-automated analysis of the averaged ECG. All parameters are derived from lead II recordings. Mean heart rate  $\pm$  SEM: Control:  $73 \pm 3$  bpm ; Non-definite ARVC:  $75 \pm 2$  bpm; Definite ARVC:  $60 \pm 3$  bpm. P-values from post hoc tests are reported on the graphs (Kruskal-Wallis ( $p<0.05$ ) with Dunn's post hoc test for PR interval; one-way ANOVA ( $p<0.05$ ) with Bonferroni post hoc test for P wave duration and area). n (number of patients) = Control: 13, Non-definite ARVC: 42, Definite ARVC: 25

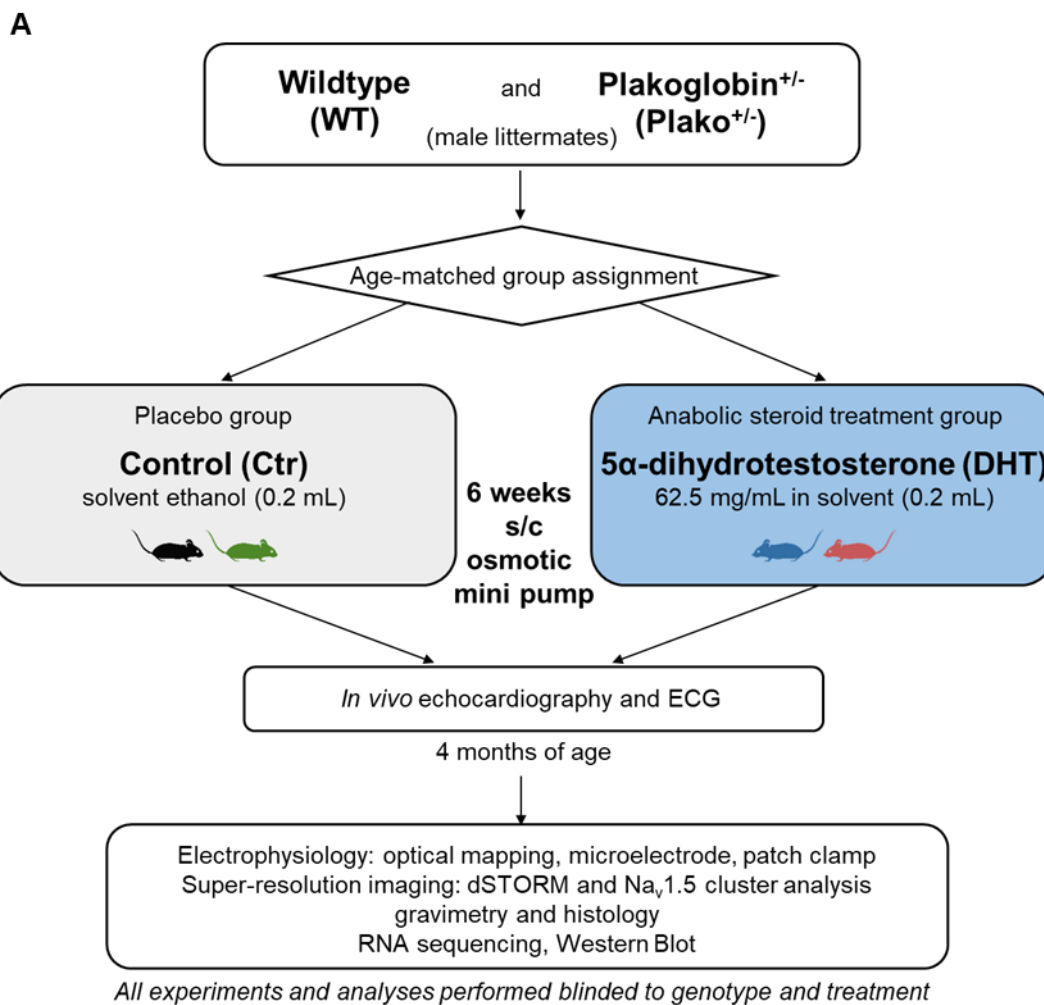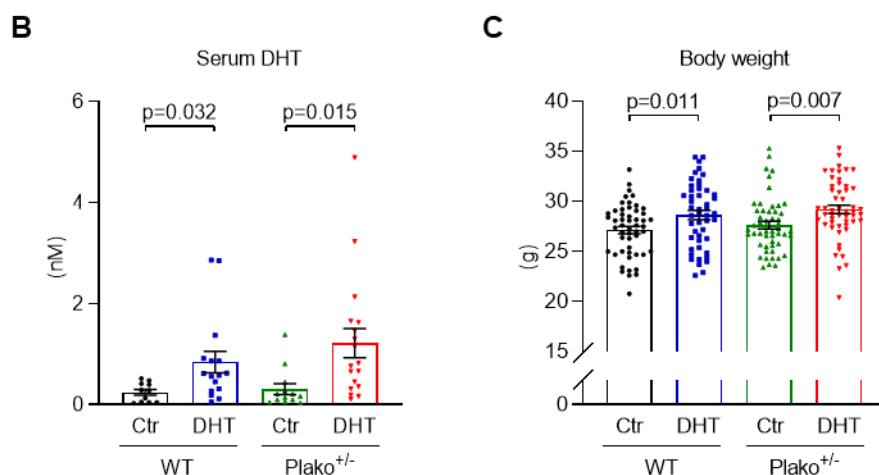

**Figure 2 - Study design for murine experiments**

(A) Experimental timeline and methods used in the underlying murine study. All results described were obtained in male WT or Plako<sup>+/-</sup> mice at 4 months of age, at the end point of the protocol, i.e. after exposure to either 5 $\alpha$ -dihydrotestosterone (DHT) or placebo control (Ctr) for 6 weeks. (B) Serum DHT concentration (n=11-18 mice/group) and (C) body weight (n=48-54 mice/group) are increased following DHT treatment.

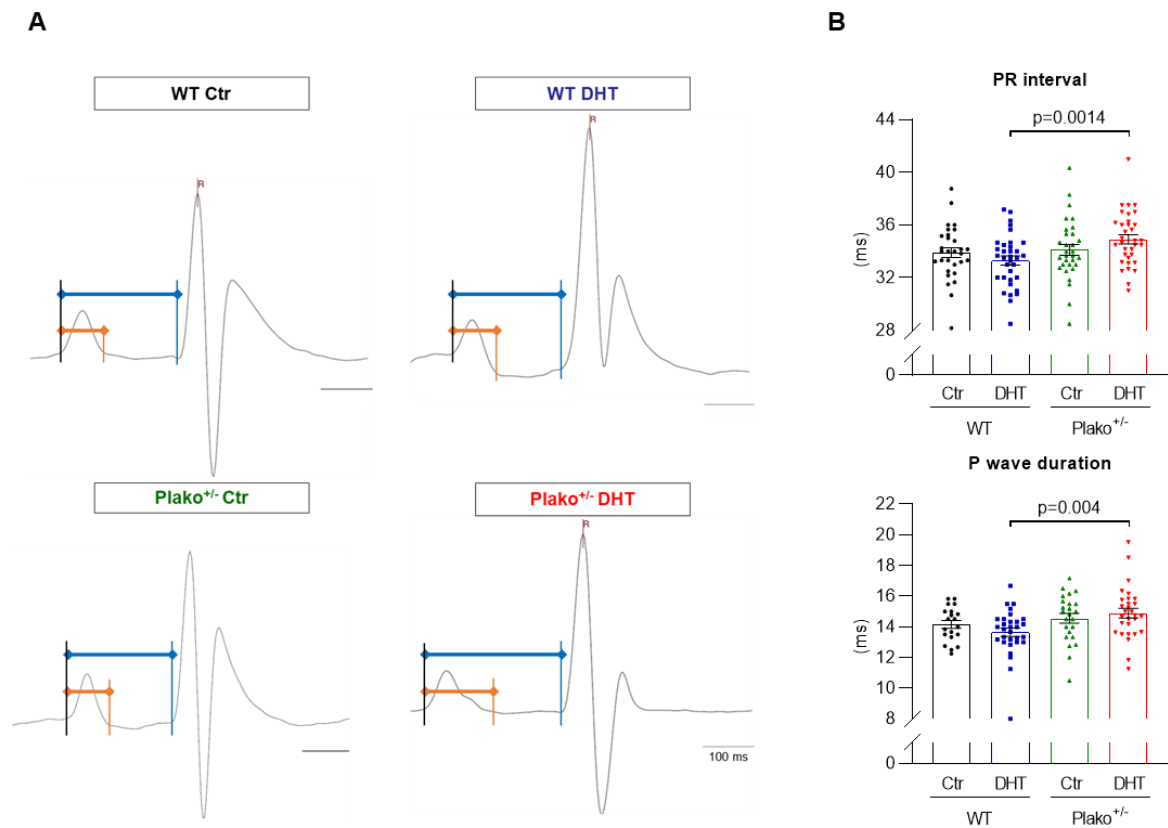

**Figure 3 - Murine awake ECGs after 6 week chronic control or DHT treatment**

(A) Exemplary lead II ECG recordings in mice. Shown are compound potentials averaged from 20 subsequent cardiac cycles. PR interval (blue) and monophasic part of P wave (orange) are marked. (B) PR interval (n=30-34 mice/group) and P wave duration (n=20-30 mice/group) are prolonged in Plako<sup>+/-</sup> DHT compared to WT DHT (2-way ANOVA p<0.05 with post-hoc t-test; p-values are indicated on graphs).

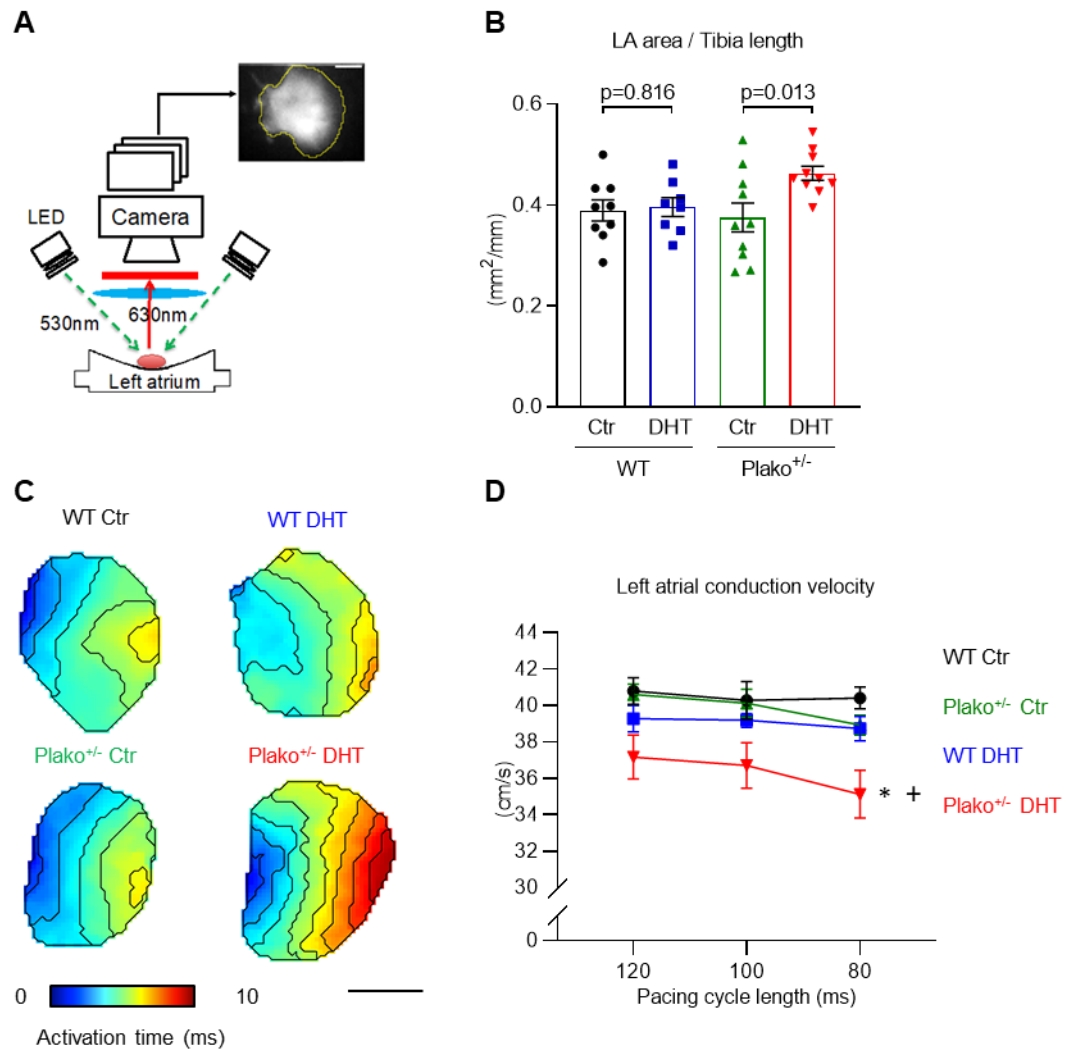

#### Figure 4 - Atrial unfolded area and conduction

(A) Experimental setup for optical mapping of isolated left atria (LA), scale bar 1 mm. DHT exposure has a significant effect on (B) LA unfolded area ( $p < 0.05$ , 2-way ANOVA) measured from optical mapping raw images and area is significantly increased in  $Plako^{+/-}$  left atria subjected to DHT (post hoc unpaired t-test, p-values indicated on graph,  $n = 8-10$  LA per group). (C) Exemplary isochronal activation maps of LA at 100 ms pacing cycle length (averaged, scale bar 1 mm). Both, heterozygous deletion of plakoglobin and DHT exposure have a significant effect on (D) LA conduction velocity ( $p < 0.05$ , 2-way repeated measures ANOVA), but it is only significantly decreased in LA of  $Plako^{+/-}$  DHT animals (Bonferroni-adjusted post hoc test,  $+p_{adj} < 0.05$  vs  $Plako^{+/-}$  Ctr;  $*p_{adj} < 0.05$  vs WT Ctr, across all cycle lengths,  $n = 8-9$  LA per group). Data plotted as mean  $\pm$  SEM.

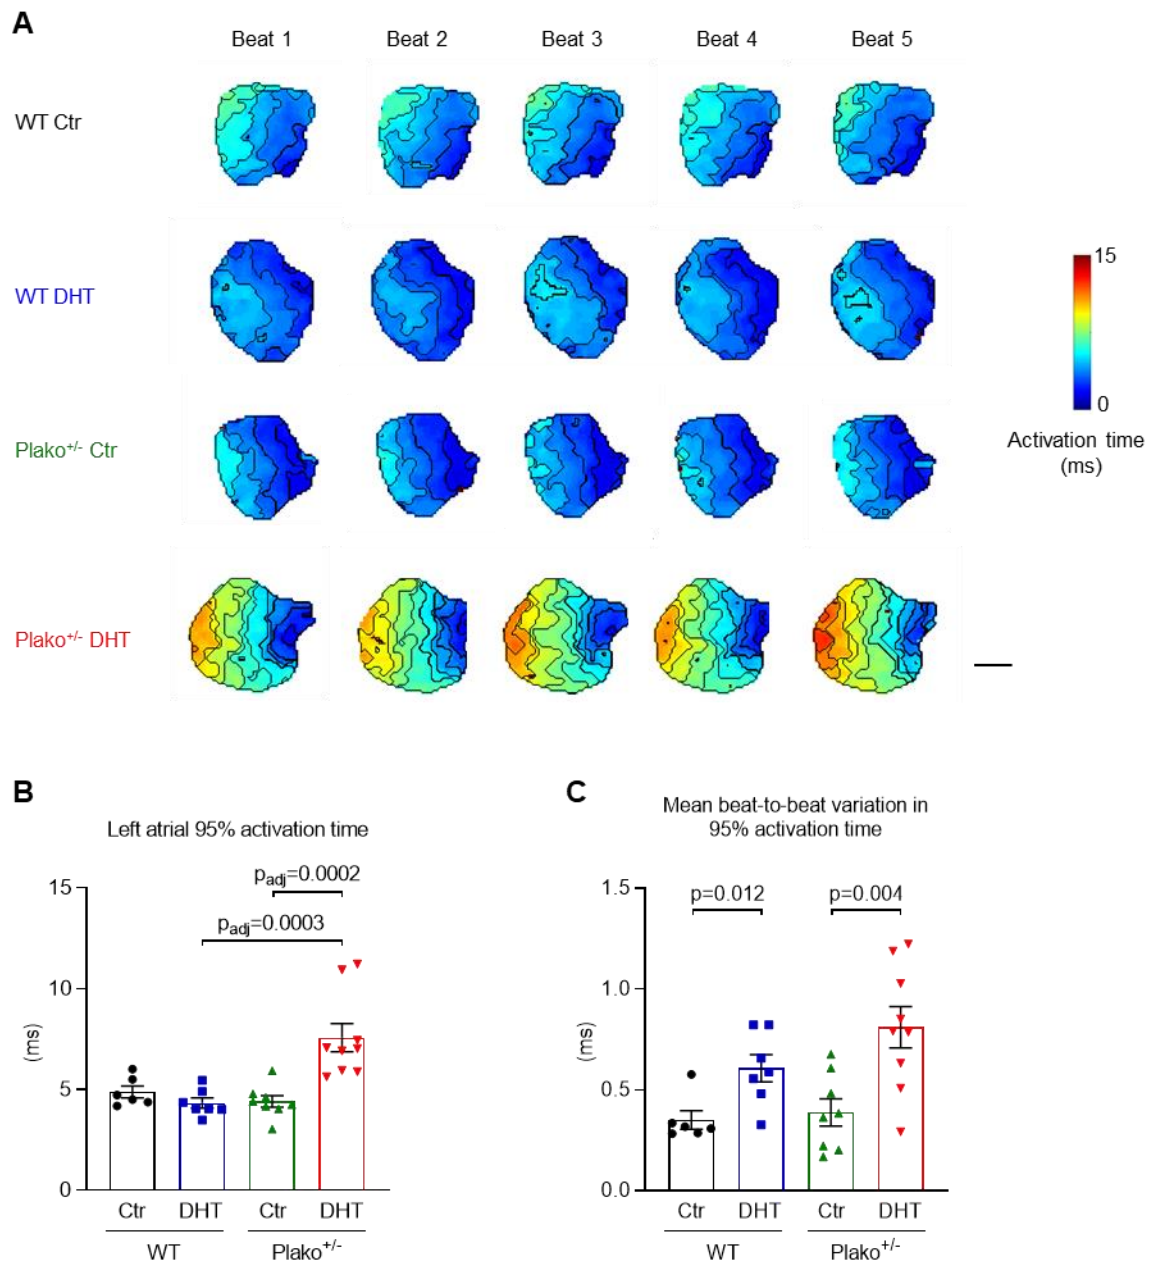

**Figure 5 - Atrial activation time and beat-to-beat variation**

(A) Example individual activation maps taken from the final 5 beats of a train of 50 pulses at 80 ms pacing cycle length (CL). DHT exposure has a significant effect on (B) beat averaged 95% left atrial activation times. Both genotype and DHT treatment have a significant effect on (C) mean beat-to-beat variation in 95% activation times calculated from the final 10 beats of a train of 50 pulses at 80 ms CL (2-way ANOVA with post-hoc analysis as appropriate, p-values indicated). Individual data points denote single left atria (LA). N = WT Control: 6 LA, WT DHT: 7 LA, Plako<sup>+/-</sup> Control: 8 LA, Plako<sup>+/-</sup> DHT: 9 LA. Scale bar in (A) indicates 1 mm.

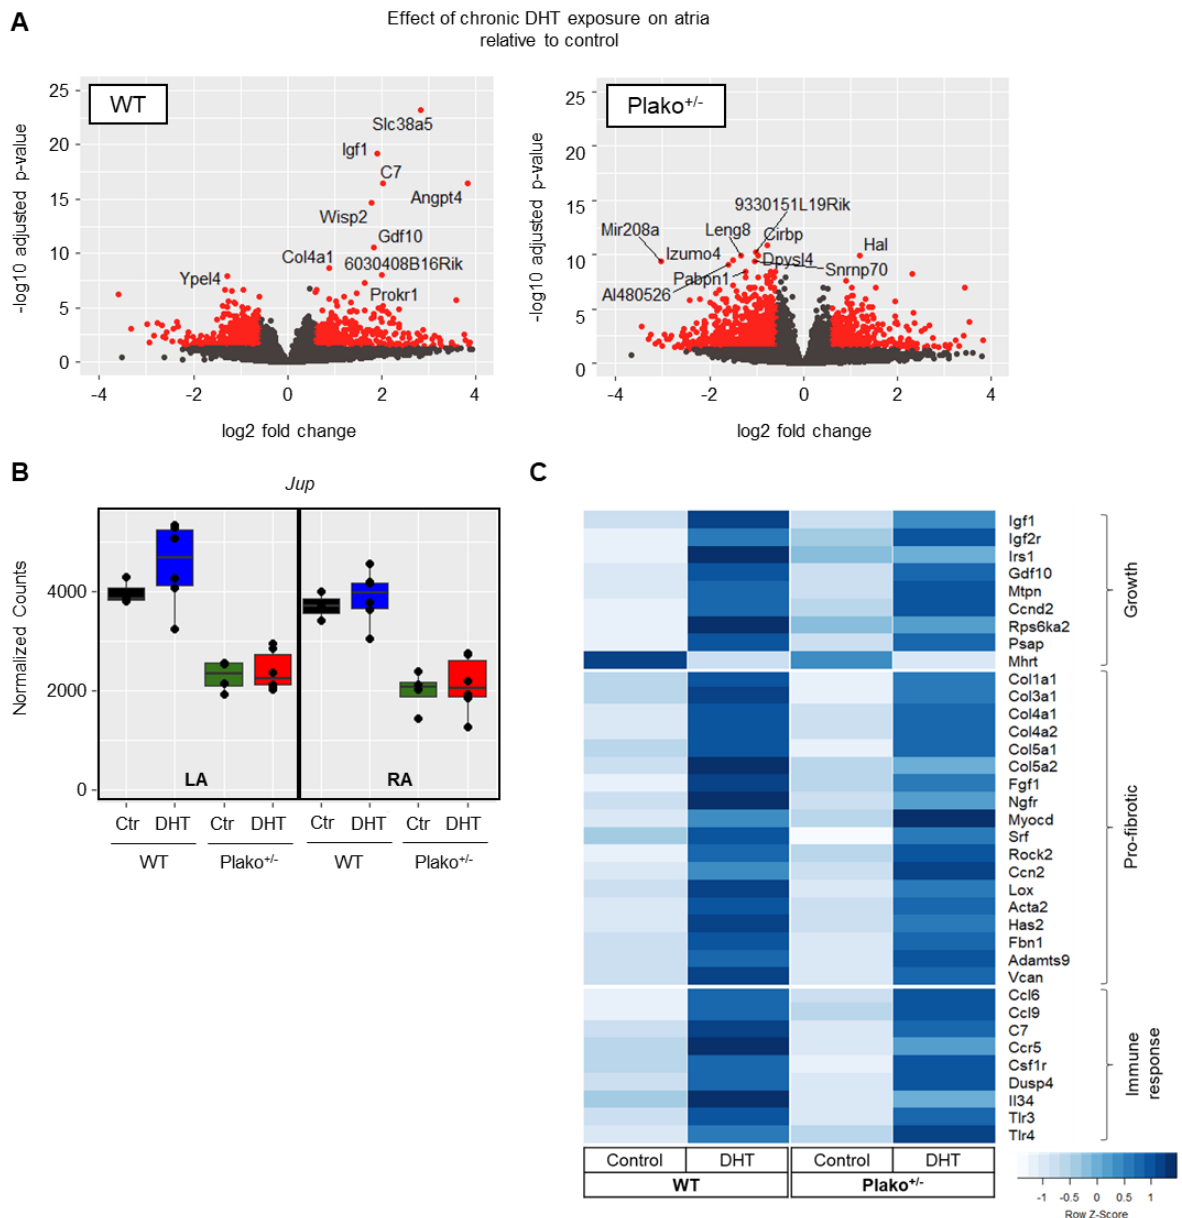

**Figure 6 - Atrial gene expression profiles. Confirmation of *Jup* deficiency and growth response.**

(A) Normalized read counts of plakoglobin gene *Jup* from RNA sequencing analysis from all groups, confirming ~50% reduction of expression in heterozygous knock-out animals (*Plako*<sup>+/-</sup>) in both left (LA) and right atria (RA) (FDR from DESeq2 WT vs *Plako*<sup>+/-</sup> <0.05 for both treatment groups). (B) Volcano plot illustrating the effect of DHT treatment, comparing gene expression of WT DHT atria to WT Ctr. Significantly differentially expressed genes at a fold change  $\geq |0.5|$  (adjusted p value from DESeq2 < 0.05) are highlighted in red, top 10 hits are labelled. (C) Selected genes significantly regulated (adjusted p value from DESeq2 < 0.05) by DHT exposure in at least one of the genotypes. DHT treatment leads to atrial growth, pro-fibrotic and immune response gene expression.

n= WT Ctr: 3 LA + 3 RA; WT DHT: 6 LA + 6 RA; *Plako*<sup>+/-</sup> Ctr: 4 LA + 4 RA; *Plako*<sup>+/-</sup> DHT: 6 LA + 6 RA. *Ccnd2*, cyclin D2; *Gdf10*, growth differentiation factor; *Igf1*, insulin-like growth factor 1; *Igf2r*, insulin-like growth factor 2 receptor; *Irs1*, insulin receptor substrate 1; *Mhrt*, myosin heavy chain associated RNA transcript; *Mtpn*, myotrophin; *Psap*, prosaposin; *Acta2*, smooth muscle ( $\alpha$ )-2 actin; *Adamts9*, ADAM metalloproteinase with thrombospondin type 1 motif 9; *Ccn2*, connective tissue growth factor; *Col1a1/3a1/4a1/4a2/5a1*, collagen type 1 alpha 1/3 alpha 1/4 alpha 1/4 alpha 2/5 alpha 1; *Fbn1*, fibrillin 1; *Fgf1*, fibroblast growth factor 1; *Has2*, hyaluronan synthase 2; *Lox*, lysyl oxidase; *Myocd*, myocardin; *Ngfr*, nerve growth factor receptor; *Rock2*, rho associated coiled-coil containing protein

kinase 2; C7, complement C7; Cd, cluster of differentiation 6; Cd9, tetraspanin CD9; Ccr5, C-C motif chemokine receptor 5; Csf1r, colony stimulating factor 1 receptor; Dusp4, dual specificity phosphatase 4; Il34, interleukin 34; Tlr3, toll like receptor 3; Tlr4, toll like receptor 4

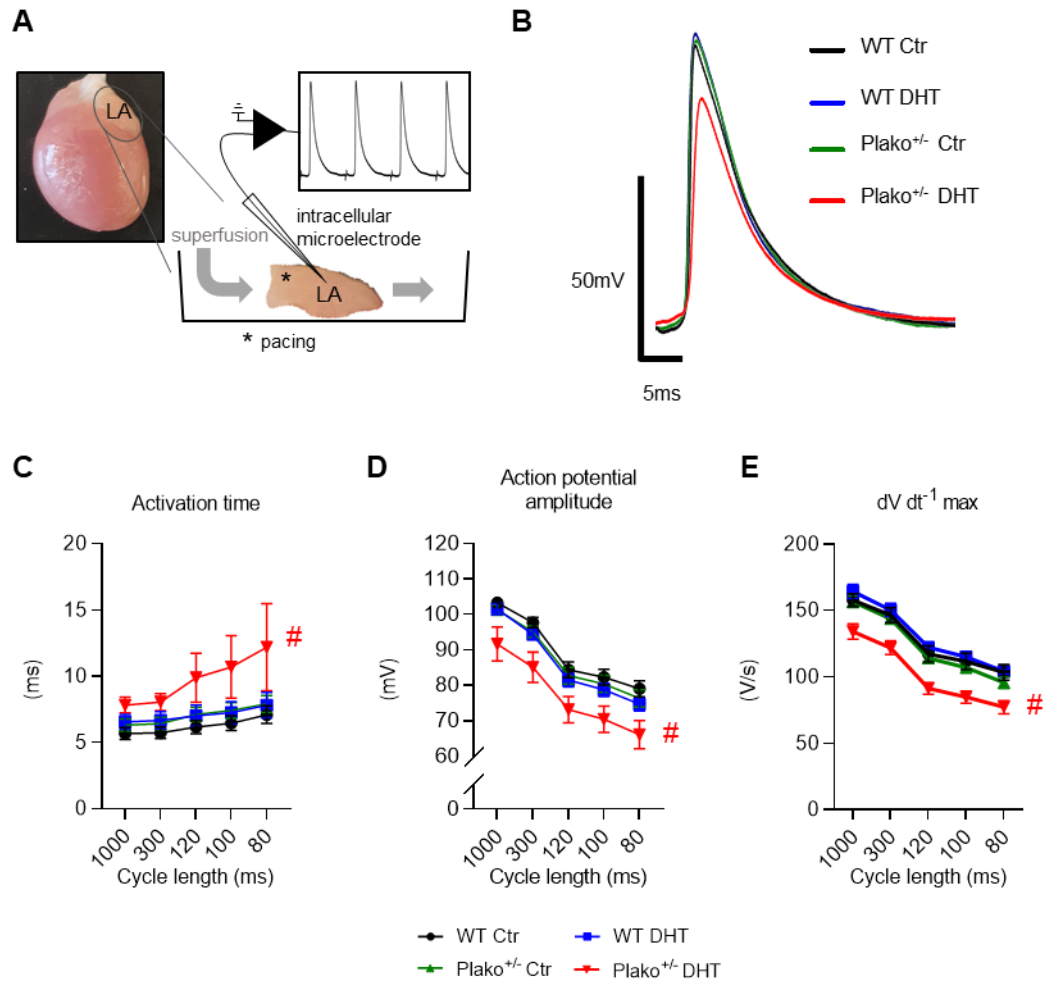

### Figure 7 - Atrial activation time and action potential characteristics

(A) Experimental setup for intracellular microelectrode measurements in paced left atria (LA) to record transmembrane action potentials. Representative examples obtained at 100 ms pacing cycle length are shown in (B). Both, heterozygous plakoglobin deletion and DHT exposure have a significant effect on mean (C) LA activation time, (D) action potential amplitude (APA) and (E) maximum upstroke velocity ( $dV dt^{-1} \max$ ) (2-way repeated measures ANOVA,  $p < 0.05$ ). WT Ctr ( $n=21$  cells,  $N=7$  LA), WT DHT ( $n=13$  cells,  $N=5$  LA), Plako<sup>+/-</sup> Ctr ( $n=20$  cells,  $N=7$  LA) and Plako<sup>+/-</sup> DHT LA ( $n=23$  cells,  $N=8$  LA). Plako<sup>+/-</sup> DHT LA have longer activation times, decreased APA and reduced  $dV dt^{-1} \max$  (Bonferroni-adjusted post hoc analysis: # $p_{adj} < 0.05$  vs all other groups, across all cycle lengths). Data averaged per atrium before performing statistical analysis and plotted as mean  $\pm$  SEM.



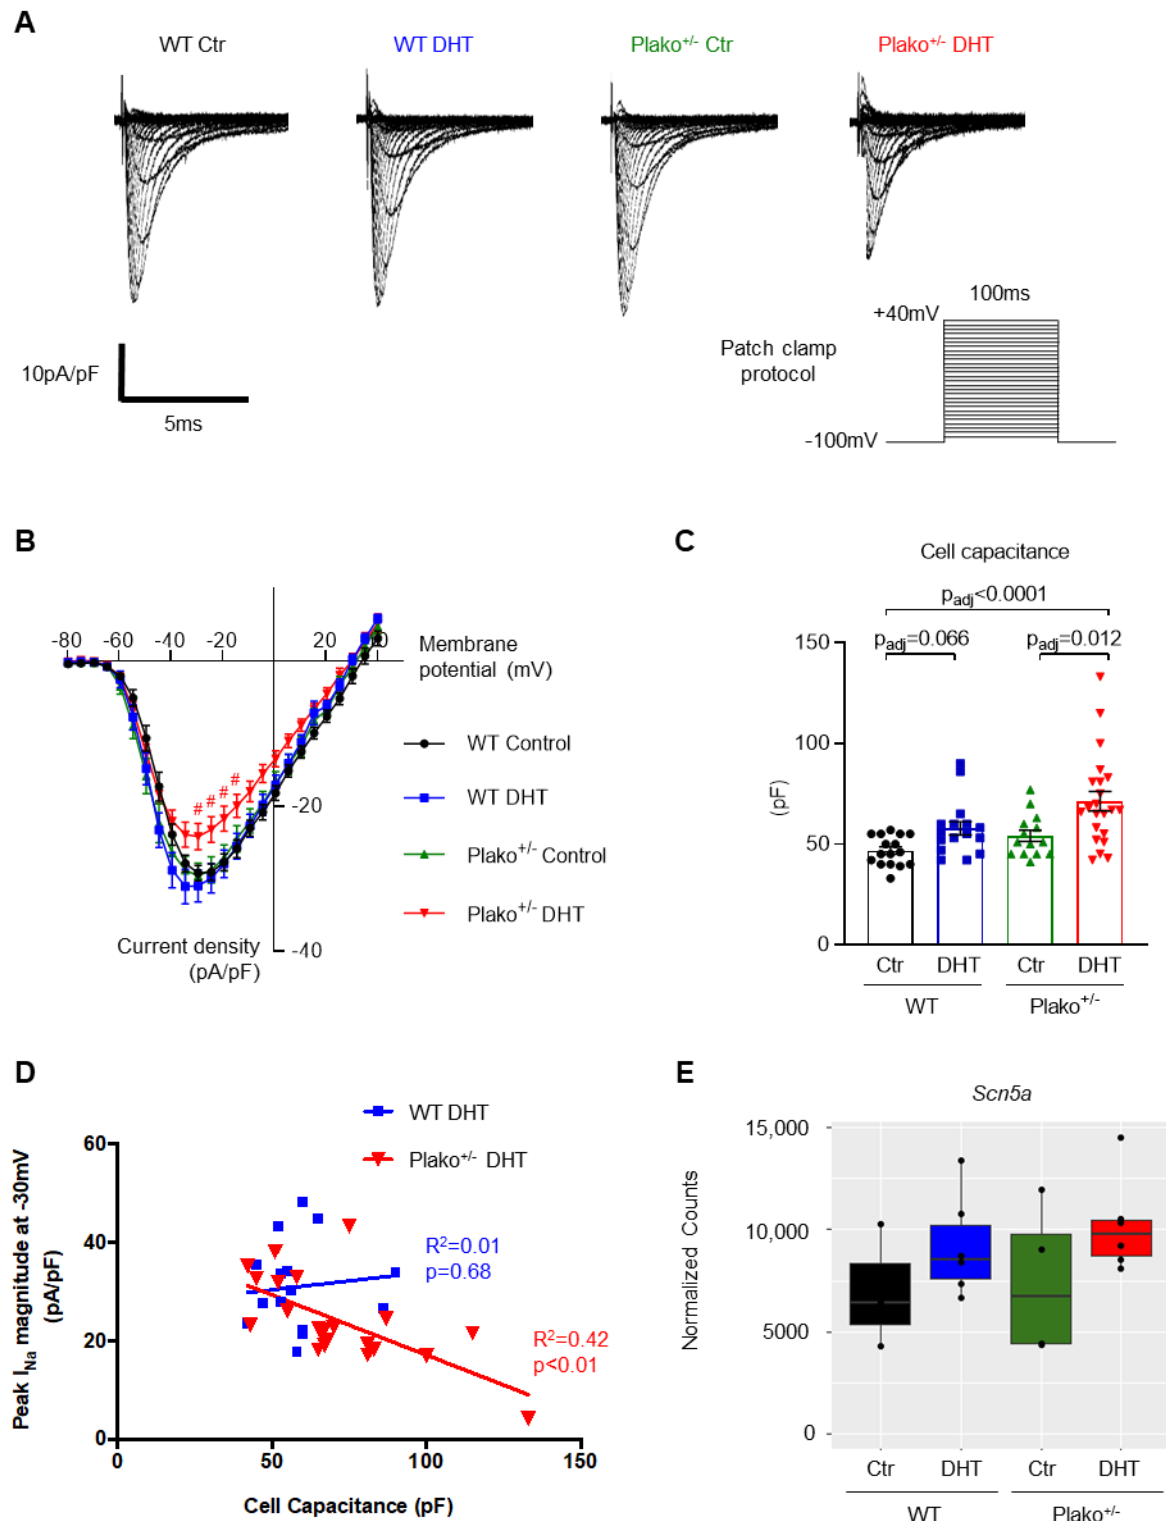

**Figure 8 - Atrial cardiomyocyte sodium current, cell capacitance and sodium channel expression**

(A) Representative left atrial (LA) whole cell peak Na<sup>+</sup> current ( $I_{Na}$ ) traces measured at test potentials -100 to +40 mV. (B) Mean current-voltage relationships for WT Ctr, WT DHT, Plako<sup>+/-</sup> Ctr and Plako<sup>+/-</sup> DHT. Plako<sup>+/-</sup> DHT LA cells have reduced  $I_{Na}$  density (2-way repeated measures ANOVA with Bonferroni post hoc analysis: # $p_{adj} < 0.05$  vs all other groups at the respective test potential). Data plotted as mean  $\pm$  SEM. Both genotype and DHT treatment show a significant effect on (C) individual cell capacitance (2-way ANOVA,  $p < 0.05$ ) as measured in WT Ctr (n=14 cells, N=5 LA), WT DHT (n=16

cells, N=5 LA), Plako<sup>+/-</sup> Ctr (n=11 cells, N=4 LA) and Plako<sup>+/-</sup> DHT (n=21 cells, N=5 LA). Data points shown individually and plotted as mean ± SEM. Bonferroni-corrected post hoc analysis shows a significant increase in cell capacity by DHT compared to Ctr in both genotypes. Cell capacitance is highest in LA cardiomyocytes from Plako<sup>+/-</sup> DHT. **(D)** Scatter plots of individual LA cell capacitance against peak I<sub>Na</sub> density for WT Ctr (n=14 cells, N=5 LA), WT DHT (n=16 cells, N=5 LA), Plako<sup>+/-</sup> Ctr (n=11 cells, N=4 LA) and Plako<sup>+/-</sup> DHT (n=21 cells, N=5 LA). There is a significant negative correlation of peak I<sub>Na</sub> density against cell capacitance for Plako<sup>+/-</sup> but not WT LA cells after DHT treatment; linear regression analysis. **(E)** Normalized read counts of sodium channel transcript *Scn5a* in LA obtained from RNA sequencing analysis (n=3-6 LA per group). Data points shown individually and box whiskers denote IQR, max-min and median.

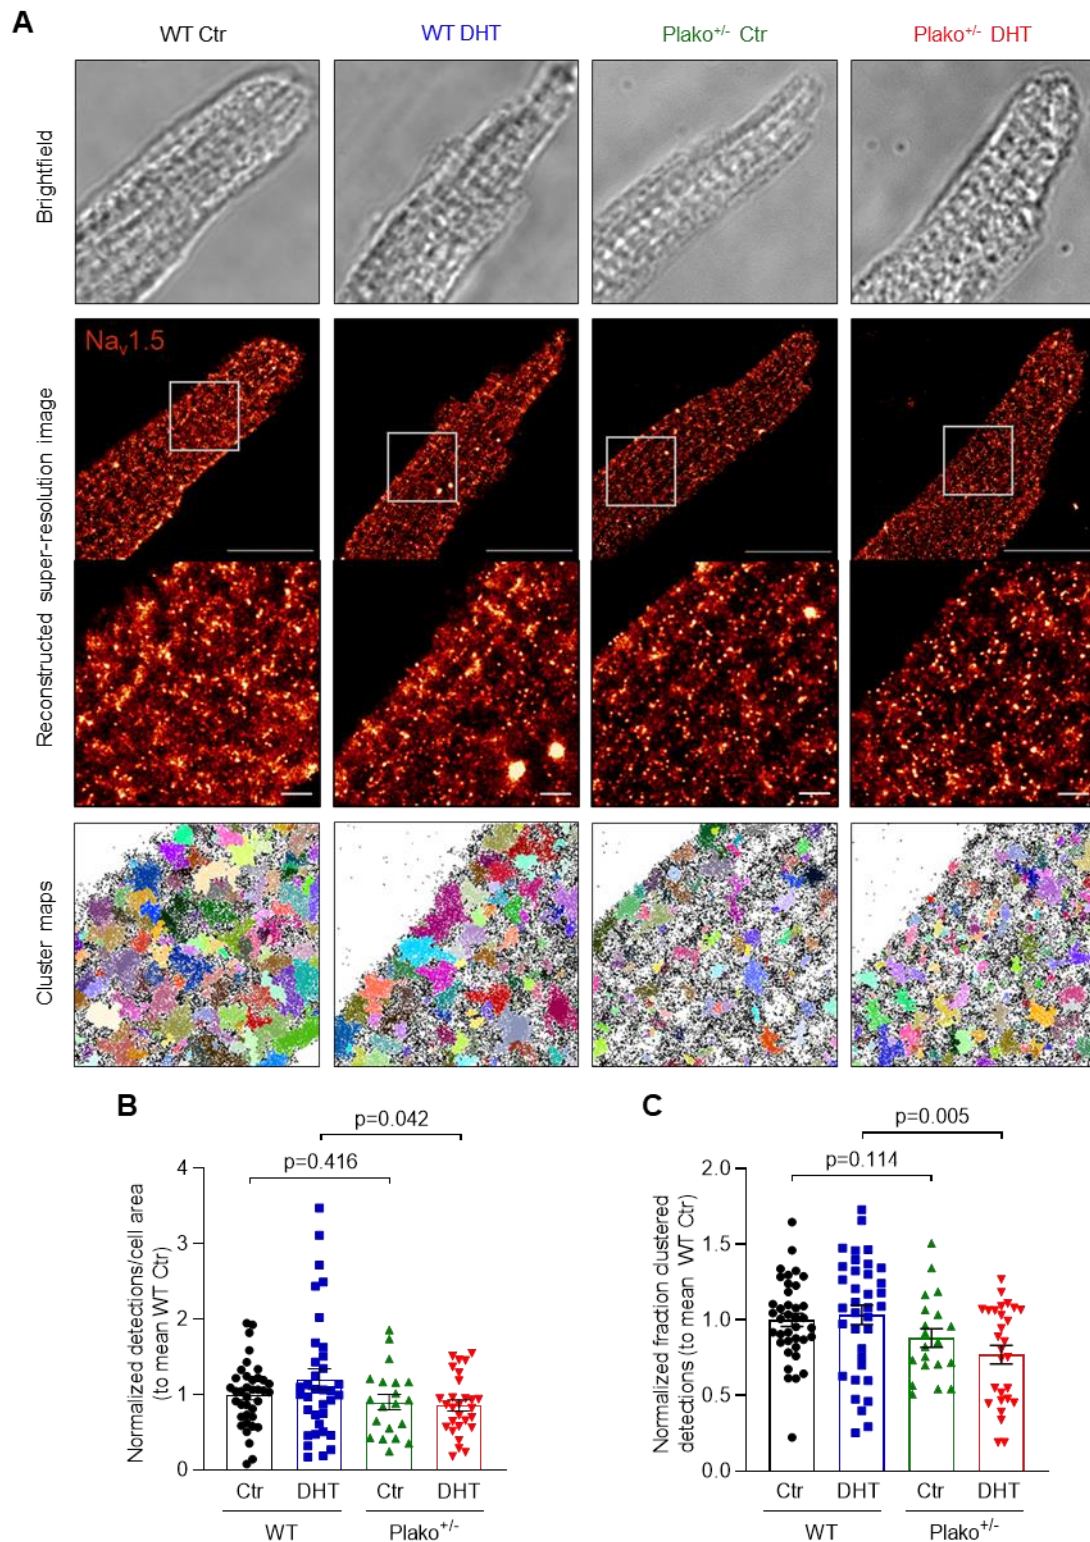

**Figure 9 - Sodium channel clustering analysis in atrial cardiomyocyte dSTORM images**

(A) Brightfield images of fixed left atrial (LA) cardiomyocytes prior to dSTORM recording (top lane), reconstructed super-resolution images of membrane Na<sub>v</sub>1.5 and zoom-ins of the indicated area (middle lanes) as well as corresponding cluster maps generated from binary images (bottom lane). Detections allocated to a cluster appear in (arbitrary) colour, non-clustered detections remain black. Scale bar 20 μm and 1.5 μm for zoom-in images, respectively. Genotype has a significant effect on (B) number of Na<sub>v</sub>1.5 detections at the LA cardiomyocyte membrane and (C) fraction of Na<sub>v</sub>1.5 detections

allocated to a cluster (2-way ANOVA,  $p < 0.05$ ). Both number and fraction of clustered membrane  $\text{Na}_v1.5$  is significantly reduced in cardiomyocytes from  $\text{Plako}^{+/-}$  DHT. Results from post-hoc t-tests are reported on the graphs. For (B) and (C): WT Ctr ( $n=38$  cells,  $N=7$  LA), WT DHT ( $n=35/36$  cells,  $N=11$  LA),  $\text{Plako}^{+/-}$  Ctr ( $n=20$  cells,  $N=5$  LA) and  $\text{Plako}^{+/-}$  DHT ( $n=28$  cells,  $N=6$  LA). Data points were normalized to the mean of the respective WT Ctr group on the same imaging session and are shown individually and plotted as mean  $\pm$  SEM.

## Tables

Table 1 - ARVC patient characteristics

| Patient characteristics                       | Non-definite<br>n=97 | Definite<br>n=49 | p value       |
|-----------------------------------------------|----------------------|------------------|---------------|
| Age at last follow-up, mean $\pm$ std (years) | 42 $\pm$ 18          | 43 $\pm$ 16      | 0.743         |
| Male, n (%)                                   | 42 (43)              | 36 (73)          | <b>0.0008</b> |
| Atrial fibrillation/flutter, n (%)            | 3 (3)                | 12 (24)          | <b>0.0001</b> |

**Table 2 - Phenotypic characteristics of the murine model**

|                                                                      | <b>WT control</b> | <b>WT DHT</b> | <b>Plako<sup>+/-</sup> control</b> | <b>Plako<sup>+/-</sup> DHT</b> |
|----------------------------------------------------------------------|-------------------|---------------|------------------------------------|--------------------------------|
| Age at terminal experiment (weeks) (n=59-67)                         | 16.5 ± 0.2        | 16.7 ± 0.2    | 16.0 ± 0.2                         | 16.6 ± 0.2                     |
| Body weight (g) (n=59-65)                                            | 27.9 ± 0.4        | 29.4 ± 0.4**  | 27.9 ± 0.4                         | 29.2 ± 0.4 <sup>+</sup>        |
| Serum DHT (nM) (n=11-18)                                             | 0.25 ± 0.06       | 0.85 ± 0.21*  | 0.31 ± 0.11                        | 1.22 ± 0.29 <sup>+</sup>       |
| Left atrial weight:tibia length (mg mm <sup>-1</sup> ) (n=29-32)     | 0.23 ± 0.01       | 0.24 ± 0.01   | 0.22 ± 0.01                        | 0.28 ± 0.02 <sup>+</sup>       |
| Right atrial weight:tibia length (mg mm <sup>-1</sup> ) (n=28-32)    | 0.25 ± 0.01       | 0.29 ± 0.01*  | 0.26 ± 0.02                        | 0.30 ± 0.03                    |
| Seminal vesicle weight:tibia length (mg mm <sup>-1</sup> ) (n=39-45) | 6.0 ± 0.4         | 6.0 ± 0.3     | 5.5 ± 0.2                          | 6.5 ± 0.3 <sup>+</sup>         |

**Murine echocardiography (light anaesthesia, mean heart rate 390-440 bpm)**

|                                                                     | <b>WT control</b> | <b>WT DHT</b> | <b>Plako<sup>+/-</sup> control</b> | <b>Plako<sup>+/-</sup> DHT</b> |
|---------------------------------------------------------------------|-------------------|---------------|------------------------------------|--------------------------------|
| Heart rate (bpm) (n=18-28)                                          | 411 ± 3           | 415 ± 3       | 413 ± 3                            | 414 ± 3                        |
| Left atrial diameter:tibia length (mm mm <sup>-1</sup> ) (n=15-23)  | 0.130 ± 0.005     | 0.140 ± 0.007 | 0.138 ± 0.006                      | 0.144 ± 0.007                  |
| Left ventricular mass:tibia length (mg mm <sup>-1</sup> ) (n=18-28) | 5.4 ± 0.3         | 5.5 ± 0.3     | 4.9 ± 0.2                          | 6.0 ± 0.3 <sup>+</sup>         |

Data presented as mean ± SEM, n=number of animals per group, \*p<0.05 vs WT control, \*\*p<0.01 vs WT control (post-hoc t-test, 2-way ANOVA p<0.05 for DHT treatment), <sup>+</sup>p<0.05 vs Plako<sup>+/-</sup> control (post-hoc t-test, 2-way ANOVA p<0.05 for DHT treatment)

**Table 3 - Prevalence of Atrial fibrillation/flutter (Atrial Arrhythmia, AA) in ARVC patients**

| Study [First author]   | Year | Number of patients              | Mean age [years, $\pm$ SD / (range)] | AA prevalence [%]         | Patients with AA; male [%] | Patients without AA; male [%] |
|------------------------|------|---------------------------------|--------------------------------------|---------------------------|----------------------------|-------------------------------|
| Tonet (3)              | 1991 | 72                              | 38 (16-73)                           | <b>24</b>                 | n.r.                       | n.r.                          |
| Jaoude (95)            | 1996 | 74                              | 37.2 $\pm$ 13.5 (11-68)              | <b>4</b>                  | n.r.                       | n.r.                          |
| Brembilla-Perot (96)   | 1998 | 47                              | 44 $\pm$ 18 (17-72)                  | <b>17</b>                 | 63                         | n.r.                          |
| Peters (97)            | 2004 | 80                              | 45.9 (22-91)                         | <b>30</b>                 | n.r.                       | n.r.                          |
| Chu (5)                | 2010 | 36                              | 47 (17-80)                           | <b>42</b>                 | 80                         | 76                            |
| Camm (4)               | 2013 | 248                             | 41.6 $\pm$ 14                        | <b>14</b>                 | 69                         | 50                            |
| Saguner (98)           | 2014 | 90                              | 49.7 $\pm$ 14.6                      | <b>20</b>                 | 61                         | 64                            |
| Wu (99)                | 2016 | 294                             | 37.7 $\pm$ 14.8                      | <b>13</b>                 | 62                         | 77                            |
| Bourfiss (100)         | 2016 | 66                              | 46.4 $\pm$ 15.8                      | <b>21</b>                 | 79                         | 50                            |
| Mazzanti (101)         | 2016 | 301                             | 38 $\pm$ 18                          | <b>4</b>                  | n.r.                       | n.r.                          |
| Gilljam (102)          | 2018 | 183                             | Median 46 (14-65)                    | <b>9</b>                  | n.r.                       | n.r.                          |
| Wu (103)               | 2018 | 100                             | 37.1 $\pm$ 12.1                      | <b>9</b>                  | n.r.                       | n.r.                          |
| Müssigbrodt (104)      | 2018 | 70                              | 53.2 $\pm$ 14.0                      | <b>37</b>                 | 62                         | 73                            |
| Cardona-Guarache (105) | 2019 | 117                             | 52 $\pm$ 14                          | <b>22</b>                 | 69                         | 57                            |
| Kikuchi (106)          | 2020 | 90                              | 44 $\pm$ 15                          | <b>36</b>                 | 78                         | 76                            |
| Baturova (34)          | 2021 | 100                             | 41 (30-55)                           | <b>28</b>                 | n.r.                       | n.r.                          |
|                        |      | <b><math>\Sigma</math> 1915</b> |                                      | <b>Weighted mean: 15%</b> |                            |                               |
| <b>Present study:</b>  |      |                                 |                                      |                           |                            |                               |
| <b>ARVC diagnosis</b>  |      |                                 |                                      |                           |                            |                               |
| Non-definite           |      | 97                              | 42 $\pm$ 18                          | <b>3</b>                  | 67                         | 43                            |
| Definite               |      | 49                              | 43 $\pm$ 16                          | <b>24</b>                 | 67                         | 73                            |

SD = standard deviation, n.r. = not reported
